# Supplementary material for: Loss of Bardet-Biedl syndrome proteins causes synaptic aberrations in principal neurons
Source: PLoS Biol. 2019 Sep 3;17(9):e3000414. doi: 10.1371/journal.pbio.3000414 (PMC6743795; doi:10.1371/journal.pbio.3000414)
Supplement: S2 Data — (XLSX) [file pbio.3000414.s011.xlsx]

## Sheet: Bbs4_DG_E19.5
WT							WT							WT							KO							KO							KO
	Name	Qty	Spines	Length(µm)	Mean			Order	Qty	Length total(µm)	mean	Spines			Radius(µm)	Intersections	Length(µm)	Spines				Name	Qty	Spines	Length(µm)	Mean			Order	Qty	Length total(µm)	mean	Spines			Radius(µm)	Intersections	Length(µm)	Spines
ID1																					ID1
Cell 1	Dendrite	1	2696	2496.3	1.08		Cell 1	1	1	22	22	26		Cell 1	30	2	28.1	31			Cell 1	Dendrite	1	1945	1658.6	1.17268		Cell 1	1	1	9.7	9.7	2		Cell 1	30	5	54	22
								2	2	86	43	75			60	3	97	92											2	2	14.6	7.3	3			60	9	251.2	238
								3	4	156.5	39.1	154			90	6	185.6	171											3	4	163.1	40.8	133			90	15	431.8	476
								4	7	432.4	61.8	482			120	8	290.9	289											4	6	194.4	32.4	196			120	13	488.1	611
								5	10	792.2	79.2	857			150	11	434.9	453											5	11	638.2	58	781			150	5	311.1	427
								6	10	649.1	64.9	711			180	15	556.4	640											6	8	638.5	79.8	830			180	2	96.7	133
								7	5	301.9	60.4	329			210	12	518.5	573																		210	0	25.6	38
								8	2	56.2	28.1	62			240	5	322.1	374
															270	0	62.9	73				Name	Qty	Spines	Length(µm)	Mean			Order	Qty	Length total(µm)	mean	Spines			Radius(µm)	Intersections	Length(µm)	Spines
																					Cell 2	Dendrite	1	1263	1470.7	0.858775		Cell 2	1	1	6.3	6.3	4		Cell 2	30	2	20.7	10
	Name	Qty	Spines	Length(µm)	Mean			Order	Qty	Length total(µm)	mean	Spines			Radius(µm)	Intersections	Length(µm)	Spines											2	2	22.5	11.2	16			60	9	242.8	159
Cell 2	Dendrite	1	2033	1970.9	1.03151		Cell 2	1	1	44.9	44.9	24		Cell 2	30	1	21.8	12											3	4	136.6	34.1	89			90	12	406.8	370
								2	2	71	35.5	61			60	2	45.8	25											4	6	271.8	45.3	212			120	8	384.4	320
								3	4	104.8	26.2	87			90	8	137	114											5	10	798.4	79.8	730			150	5	292.8	283
								4	8	626	78.2	563			120	7	239.8	179											6	6	235.2	39.2	212			180	0	123.2	121
								5	6	469.4	78.2	506			150	8	309.8	277
								6	6	380.6	63.4	459			180	9	317.9	327
								7	4	274.2	68.5	333			210	11	386.7	464				Name	Qty	Spines	Length(µm)	Mean			Order	Qty	Length total(µm)	mean	Spines			Radius(µm)	Intersections	Length(µm)	Spines
															240	7	334.8	404			Cell 3	Dendrite	1	1241	1197.6	1.03624		Cell 3	1	1	9.7	9.7	2		Cell 3	30	9	98.4	53
															270	2	143.7	182											2	2	14.6	7.3	3			60	7	219	205
															300	0	33.6	49											3	4	219.2	54.8	225			90	8	293.9	308
																													4	4	218.3	54.6	208			120	6	252.8	297
																													5	6	455.3	75.9	531			150	3	149.9	185
	Name	Qty	Spines	Length(µm)				Order	Qty	Length total(µm)	mean	Spines			Radius(µm)	Intersections	Length(µm)	Spines											6	2	280.6	140.3	272			180	2	98.1	100
Cell 3	Dendrite	1	1569	1352.3	1.16025		Cell 3	1	1	3.1	3.1	3		Cell 3	30	3	73.2	66																		210	1	64.9	75
								2	1	8.2	8.2	5			60	10	242.1	245																		240	0	20.6	18
								3	2	38.4	19.2	31			90	10	403	471
								4	4	120.7	30.2	143			120	8	370.3	458
								5	8	602.3	75.3	672			150	2	235.6	290				Name	Qty	Spines	Length(µm)	Mean			Order	Qty	Length total(µm)	mean	Spines			Radius(µm)	Intersections	Length(µm)	Spines
								6	4	252.3	63.1	268			180	0	28.1	39			Cell 4	Dendrite	1	1841	1998.2	0.921329		Cell 4	1	1	23	23	8		Cell 4	30	0	0	0
								7	4	327.2	81.8	447																	2	2	47.3	23.7	35			60	4	92.8	57
																													3	4	115.1	28.8	97			90	10	246	235
																													4	7	412.7	59	358			120	10	325.5	273
	Name	Qty	Spines	Length(µm)	Mean			Order	Qty	Length total(µm)	mean	Spines			Radius(µm)	Intersections	Length(µm)	Spines											5	10	782.1	78.2	729			150	12	395.6	349
Cell 4	Dendrite	1	2985	2553.2	1.16912		Cell 4	1	1	14.1	14.1	12		Cell 4	30	0	0	0											6	8	459.4	57.4	436			180	12	430.4	393
								2	2	68.9	34.5	77			60	2	61.8	68											7	4	158.5	39.6	178			210	9	366.1	390
								3	4	135.6	33.9	142			90	6	178.9	176																		240	1	124.1	130
								4	8	570.6	71.3	665			120	13	478.4	563																		270	0	17.7	14
								5	10	792.7	79.3	879			150	13	516.1	602
								6	10	673.8	67.4	815			180	14	534.1	637
								7	4	297.5	74.4	395			210	8	441.1	518				Name	Qty	Spines	Length(µm)	Mean			Order	Qty	Length total(µm)	mean	Spines			Radius(µm)	Intersections	Length(µm)	Spines
															240	5	244.8	312			Cell 5	Dendrite	1	1638	1446	1.13278		Cell 5	1	1	9.7	9.7	2		Cell 5	30	9	97.1	53
															270	0	97.9	109											2	2	14.6	7.3	3			60	9	246.5	219
																													3	4	161.2	40.3	139			90	12	401	460
																													4	8	421.5	52.7	477			120	9	436.1	528
	Name	Qty	Spines	Length(µm)	Mean			Order	Qty	Length total(µm)	mean	Spines			Radius(µm)	Intersections	Length(µm)	Spines											5	8	539.8	67.5	668			150	3	207.2	289
Cell 5	Dendrite	1	2517	2384.8	1.05543		Cell 5	1	1	3.1	3.1	3		Cell 5	30	3	70.3	61											6	4	299.2	74.8	349			180	1	53.4	80
								2	1	8.2	8.2	5			60	7	224.9	205																		210	0	4.6	9
								3	2	40.3	20.1	33			90	11	374	389
								4	4	124.2	31.1	125			120	13	451.8	503
								5	8	685.1	85.6	637			150	15	534.6	593				Name	Qty	Spines	Length(µm)	Mean			Order	Qty	Length total(µm)	mean	Spines			Radius(µm)	Intersections	Length(µm)	Spines
								6	8	623.2	77.9	630			180	9	424.7	469			Cell 6	Dendrite	1	1971	1604.3	1.22857		Cell 6	1	1	19.3	19.3	12		Cell 6	30	1	14	5
								7	8	446.8	55.8	533			210	3	185.8	194											2	2	79.5	39.8	88			60	4	76.7	78
								8	4	453.8	113.5	551			240	1	96.6	87											3	4	127	31.7	132			90	7	265.3	304
															270	0	22.1	16											4	8	408.8	51.1	484			120	9	328.1	391
																													5	8	645.3	80.7	816			150	11	415	513
																													6	4	324.4	81.1	439			180	6	374.9	500
	Name	Qty	Spines	Length(µm)	Mean			Order	Qty	Length total(µm)	mean	Spines			Radius(µm)	Intersections	Length(µm)	Spines																		210	2	111.2	155
Cell 6	Dendrite	1	2299	2001.3	1.14875		Cell 6	1	1	11.2	11.2	4		Cell 6	30	3	44.1	41																		240	0	19.1	25
								2	2	37.2	18.6	48			60	4	109.2	153
								3	4	311.4	77.9	433			90	6	163.9	239
								4	8	338.1	42.3	377			120	12	319	362				Name	Qty	Spines	Length(µm)	Mean			Order	Qty	Length total(µm)	mean	Spines			Radius(µm)	Intersections	Length(µm)	Spines
								5	9	533.1	59.2	565			150	17	505.8	598			Cell 7	Dendrite	1	2116	1936.3	1.09281		Cell 7	1	1	11.7	11.7	4		Cell 7	30	2	32.4	21
								6	8	619.9	77.5	672			180	10	463.5	533											2	2	31.6	15.8	33			60	5	156.6	199
								7	2	150.4	75.2	200			210	4	285.1	278											3	3	86.1	28.7	108			90	9	212	224
															240	1	86	76											4	6	322.5	53.7	407			120	15	424.1	443
															270	0	24.7	19											5	6	331.8	55.3	378			150	10	442.7	500
																													6	6	332.2	55.4	396			180	7	330.5	367
																													7	6	358.5	59.7	380			210	5	205.6	228
	Name	Qty	Spines	Length(µm)	Mean			Order	Qty	Length total(µm)	mean	Spines			.	Intersections	Length(µm)	Spines											8	2	183.5	91.7	174			240	1	91.9	93
Cell 7	Dendrite	1	2942	2918.6	1.00802		Cell 7	1	1	1.7	1.7	2		Cell 7	30	2	33.8	16											9	2	73.9	36.9	47			270	1	33.1	34
								2	3	155.6	51.9	164			60	3	89.4	66											10	2	204.7	102.4	189			300	0	7.5	7
								3	6	445.8	74.3	456			90	9	239.2	207
								4	4	197.8	49.5	185			120	11	323	311
								5	6	312.2	52	394			150	14	447.8	461				Name	Qty	Spines	Length(µm)	Mean			Order	Qty	Length total(µm)	mean	Spines			Radius(µm)	Intersections	Length(µm)	Spines
								6	6	255.4	42.6	279			180	17	571.1	620			Cell 8	Dendrite	1	2195	2257.3	0.972401		Cell 8	1	1	11.6	11.6	1		Cell 8	30	3	45	18
								7	6	426.9	71.1	448			210	16	595.1	626											2	2	28.9	14.4	18			60	6	187.7	164
								8	9	887	98.6	812			240	6	411.7	448											3	4	91.4	22.9	80			90	9	280.2	217
								9	2	236.2	118.1	202			270	3	156.5	138											4	8	352.5	44.1	309			120	14	414.1	366
															300	0	51.1	49											5	10	403.4	40.3	363			150	12	505.3	516
																													6	10	702.9	70.3	644			180	9	368	389
																													7	8	666.6	83.3	780			210	7	283.4	322
	Name	Qty	Spines	Length(µm)	Mean			Order	Qty	Length total(µm)	mean	Spines			Radius(µm)	Intersections	Length(µm)	Spines																		240	2	123.5	141
Cell 8	Dendrite	1	2701	2441.3	1.10638		Cell 8	1	1	14.1	14.1	12		Cell 8	30	1	7.8	6																		270	0	50.1	62
								2	2	68.9	34.5	77			60	4	105.8	106			ID2
								3	5	158.2	31.6	174			90	9	222.2	245
								4	8	462.4	57.8	587			120	12	489.5	607				Name	Qty	Spines	Length(µm)	Mean			Order	Qty	Length total(µm)	mean	Spines			Radius(µm)	Intersections	Length(µm)	Spines
								5	8	666.4	83.3	644			150	13	494.8	575			Cell 9	Dendrite	1	1890	1543.1	1.22481		Cell 9	1	1	11.7	11.7	4		Cell 9	30	2	25.7	15
								6	8	515	64.4	592			180	9	453.1	529											2	2	30.3	15.2	33			60	7	160.8	191
								7	4	432.5	108.1	482			210	5	265.5	261											3	3	31.4	10.5	34			90	10	275	320
								8	2	123.7	61.9	133			240	3	160.4	134											4	6	379.1	63.2	482			120	16	447.3	538
															270	2	95.1	82											5	8	362.1	45.3	425			150	9	445	586
															300	2	88	79											6	8	497.4	62.2	603			180	3	165.4	205
															330	1	41.3	53											7	4	231.1	57.8	309			210	0	23.9	35
ID2															360	0	17.8	24
																						Name	Qty	Spines	Length(µm)	Mean			Order	Qty	Length total(µm)	mean	Spines			Radius(µm)	Intersections	Length(µm)	Spines
	Name	Qty	Spines	Length(µm)	Mean			Order	Qty	Length total(µm)	mean	Spines			Radius(µm)	Intersections	Length(µm)	Spines			Cell 10	Dendrite	1	1617	1728.2	0.935656		Cell 10	1	1	6.3	6.3	4		Cell 10	30	2	26.2	17
Cell 9	Dendrite	1	2973	2519.9	1.17981		Cell 9	1	1	19.3	19.3	12		Cell 9	30	2	29.8	19											2	2	22.5	11.2	16			60	8	266.5	170
								2	2	55	27.5	52			60	5	113.2	118											3	4	199.1	49.8	158			90	11	372.5	350
								3	4	129	32.2	159			90	10	293.3	343											4	8	355.9	44.5	395			120	10	400.3	402
								4	8	328.4	41.1	398			120	13	433.6	538											5	10	776.7	77.7	730			150	8	346.4	335
								5	10	638.3	63.8	815			150	15	559.7	697											6	6	367.8	61.3	314			180	3	239.4	266
								6	10	818.4	81.8	859			180	14	536.4	635																		210	0	76.9	77
								7	6	315.2	52.5	384			210	5	388.2	472
								8	2	216.2	108.1	294			240	2	114.1	112
															270	1	42.6	33
															300	0	9.1	6				Name	Qty	Spines	Length(µm)	Mean			Order	Qty	Length total(µm)	mean	Spines			Radius(µm)	Intersections	Length(µm)	Spines
																					Cell 11	Dendrite	1	2115	2103	1.00571		Cell 11	1	1	11.6	11.6	1		Cell 11	30	3	34.6	8
																													2	2	16	8	5			60	5	154.1	115
	Name	Qty	Spines	Length(µm)	Mean			Order	Qty	Length total(µm)	mean	Spines			Radius(µm)	Intersections	Length(µm)	Spines											3	4	164.4	41.1	145			90	8	218.8	185
Cell 10	Dendrite	1	2121	2098.1	1.01091		Cell 10	1	1	32.8	32.8	17		Cell 10	30	1	31.5	17											4	6	330.8	55.1	294			120	7	253.8	258
								2	2	50.4	25.2	39			60	3	91	62											5	10	657.9	65.8	642			150	11	311.6	316
								3	4	253.5	63.4	229			90	8	235.7	202											6	10	922.3	92.2	1028			180	10	365.4	378
								4	8	359.5	44.9	396			120	9	342.2	343																		210	8	347.2	389
								5	8	567	70.9	620			150	11	428.1	473																		240	6	250	266
								6	8	566.4	70.8	557			180	10	400	426																		270	1	145.6	170
								7	2	72.2	36.1	64			210	8	282.2	283																		300	0	22	30
								8	2	86.4	43.2	75			240	3	187.1	196
								9	2	109.8	54.9	124			270	1	62.8	78
															300	1	35.6	39				Name	Qty	Spines	Length(µm)	Mean			Order	Qty	Length total(µm)	mean	Spines			Radius(µm)	Intersections	Length(µm)	Spines
															330	0	2	2			Cell 12	Dendrite	1	1997	1927.9	1.03584		Cell 12	1	1	0.9	0.9	0		Cell 12	30	4	51.7	27
																													2	2	10.3	5.1	4			60	9	236.7	162
																													3	4	178.8	44.7	130			90	10	366.1	396
	Name	Qty	Spines	Length(µm)	Mean			Order	Qty	Length total(µm)	mean	Spines			Radius(µm)	Intersections	Length(µm)	Spines											4	6	412.7	68.8	426			120	9	328	389
Cell 11	Dendrite	1	3370	2979.5	1.13106		Cell 11	1	1	14.1	14.1	12		Cell 11	30	1	12.6	10											5	8	755.5	94.4	735			150	9	296.8	356
								2	2	68.9	34.5	77			60	4	108.8	101											6	6	569.7	95	702			180	6	266.4	275
								3	4	158.3	39.6	180			90	9	213.3	261																		210	5	176.6	175
								4	8	482.4	60.3	613			120	11	420.7	541																		240	4	149.3	153
								5	10	697.2	69.7	733			150	15	474.1	487																		270	1	50.6	56
								6	13	747.6	57.5	867			180	14	658.6	724																		300	0	5.6	8
								7	8	701.3	87.7	764			210	15	541.3	597
								8	2	109.8	54.9	124			240	5	372.7	451
															270	3	148.1	167				Name	Qty	Spines	Length(µm)	Mean			Order	Qty	Length total(µm)	mean	Spines			Radius(µm)	Intersections	Length(µm)	Spines
															300	0	29.3	31			Cell 13	Dendrite	1	2190	2085.3	1.05021		Cell 13	1	1	23	23	8		Cell 13	30	0	0	0
																													2	2	46.3	23.1	34			60	4	86	52
																													3	4	139.1	34.8	125			90	7	195.4	185
	Name	Qty	Spines	Length(µm)	Mean			Order	Qty	Length total(µm)	mean	Spines			Radius(µm)	Intersections	Length(µm)	Spines											4	8	426.3	53.3	419			120	11	336.1	325
Cell 12	Dendrite	1	2482	2380.8	1.04251		Cell 12	1	1	16.9	16.9	12		Cell 12	30	2	38.4	26											5	8	739.4	92.4	876			150	11	430.6	460
								2	2	55.5	27.8	44			60	7	155.8	143											6	6	543.4	90.6	524			180	10	341.4	402
								3	4	124.6	31.1	119			90	8	266.7	271											7	2	167.8	83.9	204			210	8	304	360
								4	8	649.6	81.2	681			120	10	349.5	379																		240	5	229.3	244
								5	10	831.9	83.2	930			150	15	463	514																		270	2	124.6	123
								6	8	702.4	87.8	696			180	10	466	497																		300	0	38	39
															210	7	357.1	381
															240	3	203.8	196
															270	0	80.6	75				Name	Qty	Spines	Length(µm)	Mean			Order	Qty	Length total(µm)	mean	Spines			Radius(µm)	Intersections	Length(µm)	Spines
																						Dendrite	1	2117	1950.1	1.08559		Cell 14	1	1	0.9	0.9	0		Cell 14	30	2	1.6	0
																					Cell 14								2	2	10.3	5.1	4			60	9	279.5	185
	Name	Qty	Spines	Length(µm)	Mean			Order	Qty	Length total(µm)	mean	Spines			Radius(µm)	Intersections	Length(µm)	Spines											3	4	205	51.2	156			90	15	474.4	505
Cell 13	Dendrite	1	2655	2137.7	1.24199		Cell 13	1	1	19.3	19.3	12		Cell 13	30	2	41	29											4	6	251.5	41.9	261			120	15	580.3	700
								2	2	51	25.5	43			60	6	120.1	126											5	8	557.5	69.7	651			150	7	401.4	484
								3	4	124.9	31.2	154			90	13	347.5	456											6	8	410.7	51.3	449			180	1	100.1	125
								4	8	431.8	54	567			120	13	512.7	671											7	6	418.7	69.8	464			210	1	37.3	43
								5	8	454.8	56.9	635			150	13	491.7	636											8	2	95.4	47.7	132			240	1	34.9	34
								6	6	446.8	74.5	587			180	9	365.7	439																		270	1	34.4	32
								7	8	516.9	64.6	547			210	3	223.7	256																		300	0	6.1	9
								8	2	92.3	46.1	110			240	0	35.2	42
																						Name	Qty	Spines	Length(µm)	Mean			Order	Qty	Length total(µm)	mean	Spines			Radius(µm)	Intersections	Length(µm)	Spines
	Name	Qty	Spines	Length(µm)	Mean			Order	Qty	Length total(µm)	mean	Spines			Radius(µm)	Intersections	Length(µm)	Spines			Cell 15	Dendrite	2	1360	1688.2	0.805592		Cell 15	1	2	26.1	13.1	11		Cell 15	30	2	27	11
Cell 14	Dendrite	1	2606	2242.4	1.16215		Cell 14	1	1	58.8	58.8	52		Cell 14	30	1	10.9	4											2	2	84	42	62			60	3	90.4	59
								2	2	50.7	25.4	60			60	1	47	48											3	4	147.8	36.9	141			90	9	277.3	197
								3	3	113.7	37.9	157			90	3	111.9	143											4	8	579	72.4	473			120	12	443.1	344
								4	6	576.1	96	538			120	6	186.1	207											5	6	325.8	54.3	287			150	9	388.5	317
								5	8	324.5	40.6	429			150	9	317.6	338											6	4	268	67	192			180	4	253.9	222
								6	10	752	75.2	876			180	14	526.2	623											7	2	156.6	78.3	94			210	3	112	96
								7	4	366.7	91.7	494			210	11	541.8	680											8	2	101	50.5	100			240	1	67.6	76
															240	8	342.7	396																		270	0	28.5	38
															270	0	158.2	167
	Name	Qty	Spines	Length(µm)	Mean			Order	Qty	Length total(µm)	mean	Spines			Radius(µm)	Intersections	Length(µm)	Spines				Name	Qty	Spines	Length(µm)	Mean			Order	Qty	Length total(µm)	mean	Spines			Radius(µm)	Intersections	Length(µm)	Spines
Cell 15	Dendrite	1	2329	2026.2	1.14944		Cell 15	1	1	19.3	19.3	12		Cell 15	30	2	36.4	26			Cell 16	Dendrite	2	2281	1938.3	1.1768		Cell 16	1	2	79.2	39.6	73		Cell 16	30	1	24	23
								2	2	55	27.5	52			60	5	122.6	129											2	4	192.8	48.2	218			60	4	97.9	105
								3	4	129	32.2	159			90	10	338.4	416											3	6	328.7	54.8	389			90	9	264.8	278
								4	7	273.8	39.1	344			120	11	398.3	433											4	10	614.2	61.4	647			120	11	383.8	416
								5	8	647.4	80.9	763			150	11	401.4	437											5	8	469.7	58.7	620			150	13	435.4	503
								6	10	455.9	45.6	519			180	10	357.2	414											6	6	253.6	42.3	334			180	9	448.1	576
								7	6	445.7	74.3	480			210	5	287.2	349																		210	6	237.2	320
															240	1	74.1	107			ID3															240	0	47.1	60
															270	0	10.7	18
																						Name	Qty	Spines	Length(µm)	Mean		Cell 17	Order	Qty	Length total(µm)	mean	Spines			Radius(µm)	Intersections	Length(µm)	Spines
	Name	Qty	Spines	Length(µm)	Mean			Order	Qty	Length total(µm)	mean	Spines			Radius(µm)	Intersections	Length(µm)	Spines			Cell 17	Dendrite	1	2095	1869	1.12092		Cell 17	1	1	15.9	15.9	13		Cell 17	30	2	22.1	15
Cell 16	Dendrite	2	1760	1874.3	0.939017		Cell 16	1	2	41.7	20.9	24		Cell 16	30	3	60.1	35											2	2	52.5	26.3	54			60	4	96.5	102
								2	4	150.4	37.6	128			60	6	169.1	137											3	4	143.6	35.9	178			90	10	294	336
								3	8	594.9	74.4	514			90	10	294	262											4	8	425.3	53.2	496			120	13	445.4	499
								4	6	379.8	63.3	339			120	13	440.9	391											5	10	657	65.7	795			150	14	481.2	534
								5	8	612.4	76.6	646			150	9	419.2	423											6	8	574.6	71.8	559			180	6	365	419
								6	2	94.9	47.5	109			180	7	260.4	255																		210	2	153.1	178
															210	3	160	181																		240	0	11.6	12
															240	0	70.5	76
ID3
																						Name	Qty	Spines	Length(µm)	Mean			Order	Qty	Length total(µm)	mean	Spines			Radius(µm)	Intersections	Length(µm)	Spines
	Name	Qty	Spines	Length(µm)	Mean			Order	Qty	Length total(µm)	mean	Spines			Radius(µm)	Intersections	Length(µm)	Spines			Cell 18	Dendrite	1	1739	1762.1	0.986891		Cell 18	1	1	15.9	15.9	13		Cell 18	30	0	0	0
Cell 17	Dendrite	1	1843	1750.4	1.0529		Cell 17	1	1	26.8	26.8	29		Cell 17	60	1	25	27											2	2	53.6	26.8	54			60	3	80.2	68
								2	2	50.7	25.4	60			90	3	126.5	166											3	4	188.4	47.1	188			90	5	188.3	172
								3	3	140.7	46.9	174			120	6	198.7	196											4	8	480	60	441			120	10	257	214
								4	6	522.6	87.1	482			150	8	271.3	267											5	12	1024.3	85.4	1043			150	13	484.9	465
								5	4	95.1	23.8	96			180	11	432.4	441																		180	10	452.7	487
								6	6	390.9	65.1	455			210	6	395.5	433																		210	5	264.7	290
								7	6	344.3	57.4	398			240	4	173.6	194																		240	0	34.3	43
								8	2	179.4	89.7	149			270	2	101.6	93
															300	0	25.9	26				Name	Qty	Spines	Length(µm)	Mean			Order	Qty	Length total(µm)	mean	Spines			Radius(µm)	Intersections	Length(µm)	Spines
																					Cell 19	Dendrite	1	1976	1970.2	1.00294		Cell 19	1	1	15.9	15.9	13		Cell 19	30	2	24.5	16
																													2	2	61.4	30.7	56			60	3	91.4	94
	Name	Qty	Spines	Length(µm)	Mean			Order	Qty	Length total(µm)	mean	Spines			Radius(µm)	Intersections	Length(µm)	Spines											3	4	237.8	59.5	176			90	6	187.6	155
Cell 18	Dendrite	1	1968	2001.3	0.983361		Cell 18	1	1	23	23	8		Cell 18	30	2	24	8											4	8	456.1	57	477			120	9	276.4	247
								2	2	74	37	59			60	3	89.4	68											5	10	650.9	65.1	679			150	12	406	374
								3	4	208.9	52.2	200			90	7	191	173											6	6	548.1	91.4	575			180	9	414.4	450
								4	8	369.1	46.1	363			120	11	282.3	267																		210	6	282.3	286
								5	11	872.7	79.3	886			150	11	344	345																		240	3	177.4	197
								6	6	453.6	75.6	452			180	12	426.7	425																		270	2	85.6	119
															210	9	394	410																		300	0	24.6	38
															240	4	184.7	198
															270	0	65.2	74
																						Name	Qty	Spines	Length(µm)	Mean			Order	Qty	Length total(µm)	mean	Spines			Radius(µm)	Intersections	Length(µm)	Spines
																					Cell 20	Dendrite	2	2039	2146.5	0.949918		Cell 20	1	2	41.9	21	31		Cell 20	30	0	0	0
	Name	Qty	Spines	Length(µm)	Mean			Order	Qty	Length total(µm)	mean	Spines			Radius(µm)	Intersections	Length(µm)	Spines											2	2	53.9	26.9	33			60	6	147.7	109
Cell 19	Dendrite	2	1712	1868.6	0.916194		Cell 19	1	2	19.1	9.5	1		Cell 19	30	2	25.6	2											3	4	156.9	39.2	152			90	7	215	201
								2	2	43.2	21.6	23			60	6	147.8	107											4	8	746.5	93.3	752			120	13	357.6	335
								3	4	386.5	96.6	407			90	7	242.2	244											5	10	922.1	92.2	852			150	12	474.3	464
								4	4	345.2	86.3	307			120	8	241.6	228											6	2	77.5	38.8	69			180	9	475.7	427
								5	4	643	160.8	585			150	8	258.5	232											7	2	147.6	73.8	150			210	6	269	291
								6	4	367.8	92	317			180	7	247.7	227																		240	3	148.7	162
								7	2	63.9	31.9	72			210	7	230.4	218																		270	1	45.2	33
															240	5	255	228																		300	0	13.3	17
															270	4	193.2	190
															300	0	26.7	36
																						Name	Qty	Spines	Length(µm)	Mean			Order	Qty	Length total(µm)	mean	Spines			Radius(µm)	Intersections	Length(µm)	Spines
																					Cell 21	Dendrite	1	1945	2118.6	0.918059		Cell 21	1	1	14.8	14.8	10		Cell 21	30	0	0	0
	Name	Qty	Spines	Length(µm)	Mean			Order	Qty	Length total(µm)	mean	Spines			Radius(µm)	Intersections	Length(µm)	Spines											2	2	45.1	22.5	33			60	5	193	160
Cell 20	Dendrite	1	992	1198.7	0.827563		Cell 20	1	1	75.5	75.5	39		Cell 20	30	1	21.8	5											3	4	149.8	37.4	139			90	8	242	229
								2	2	51.4	25.7	40			60	1	31	18											4	8	745	93.1	715			120	11	383.9	379
								3	4	499.8	125	407			90	2	44.5	28											5	10	837.1	83.7	828			150	13	475.3	424
								4	4	419.1	104.8	381			120	4	117.4	94											6	4	248.3	62.1	160			180	11	456	390
								5	2	152.8	76.4	125			150	5	165	145											7	2	78.5	39.3	60			210	3	230.5	225
															180	6	198.1	178																		240	3	114.2	108
															210	6	234.1	210																		270	0	23.7	30
															240	4	195.2	160
															270	3	102.1	74
															300	1	75.5	68				Name	Qty	Spines	Length(µm)	Mean			Order	Qty	Length total(µm)	mean	Spines			Radius(µm)	Intersections	Length(µm)	Spines
															330	0	13.8	12			Cell 22	Dendrite	1	2625	2553	1.0282		Cell 22	1	1	0.9	0.9	1		Cell 22	30	2	56.4	40
																													2	3	173.5	57.8	231			60	3	93.2	76
																													3	4	194	48.5	187			90	6	202.4	203
	Name	Qty	Spines	Length(µm)	Mean			Order	Qty	Length total(µm)	mean	Spines			Radius(µm)	Intersections	Length(µm)	Spines											4	8	474.6	59.3	521			120	12	411.5	443
Cell 21	Dendrite	1	2277	2240.8	1.01615		Cell 21	1	1	23	23	8		Cell 21	30	2	32.2	13											5	6	239.3	39.9	276			150	13	547.1	581
								2	2	74	37	59			60	3	87	66											6	5	275.8	55.2	220			180	13	524	556
								3	4	214	53.5	202			90	8	218.4	206											7	7	388.7	55.5	279			210	8	377.1	401
								4	6	350.1	58.4	319			120	10	304.6	321											8	4	341.3	85.3	425			240	4	231.6	235
								5	10	849.8	85	963			150	13	386.8	413											9	6	464.7	77.4	485			270	2	98.7	77
								6	8	729.9	91.2	726			180	13	446.5	476																		300	0	11	13
															210	8	397.9	402
															240	5	239.4	254
															270	1	118.4	116				Name	Qty	Spines	Length(µm)	Mean			Order	Qty	Length total(µm)	mean	Spines			Radius(µm)	Intersections	Length(µm)	Spines
															300	0	9.5	10			Cell 23	Dendrite	1	1494	1558.4	0.958676		Cell 23	1	1	10.2	10.2	7		Cell 23	30	2	30.9	19
																													2	2	45.8	22.9	41			60	4	142.1	144
																													3	4	179.3	44.8	166			90	10	255.9	230
	Name	Qty	Spines	Length(µm)	Mean			Order	Qty	Length total(µm)	mean	Spines			Radius(µm)	Intersections	Length(µm)	Spines											4	8	446.7	55.8	443			120	10	421.1	404
Cell 22	Dendrite	3	3766	3991.5	0.943505		Cell 22	1	3	181.5	60.5	129		Cell 22	30	4	91.9	48											5	8	323.9	40.5	299			150	9	374.1	356
								2	4	337	84.3	271			60	6	185.8	134											6	8	552.4	69.1	538			180	5	239.9	237
								3	6	240.6	40.1	221			90	15	390.8	353																		210	0	94.5	104
								4	10	461.9	46.2	417			120	18	584.4	551
								5	18	1694.7	94.1	1676			150	22	756.7	738
								6	12	1075.8	89.7	1052			180	20	748.7	745				Name	Qty	Spines	Length(µm)	Mean			Order	Qty	Length total(µm)	mean	Spines			Radius(µm)	Intersections	Length(µm)	Spines
															210	14	629.5	607			Cell 24	Dendrite	1	1966	1781.3	1.10369		Cell 24	1	1	3.9	3.9	6		Cell 24	30	0	0	0
															240	9	403.7	403											2	2	26.4	13.2	21			60	7	218.2	210
															270	2	181.4	171											3	4	149.4	37.3	158			90	9	318.7	372
															300	0	18.6	16											4	8	748.8	93.6	804			120	11	352.1	382
																													5	10	769	76.9	859			150	12	419.3	480
																													6	2	83.8	41.9	118			180	6	300.5	331
	Name	Qty	Spines	Length(µm)	Mean			Order	Qty	Length total(µm)	mean	Spines			Radius(µm)	Intersections	Length(µm)	Spines																		210	2	121.2	148
Cell 23	Dendrite	2	1489	1750.7	0.850517		Cell 23	1	2	158.5	79.2	121		Cell 23	30	2	55.3	32																		240	1	42.4	37
								2	2	263	131.5	212			60	3	96	65																		270	0	8.9	6
								3	2	26.6	13.3	19			90	6	165.8	140
								4	4	111.8	27.9	98			120	8	274.8	226
								5	8	844.9	105.6	713			150	10	363.5	313
								6	4	345.9	86.5	326			180	7	310.6	281
															210	6	232.8	209
															240	4	170.1	157
															270	1	70.4	57
															300	0	11.3	9
	Name	Qty	Spines	Length(µm)	Mean			Order	Qty	Length total(µm)	mean	Spines			Radius(µm)	Intersections	Length(µm)	Spines
Cell 24	Dendrite	2	1758	1975	0.890127		Cell 24	1	2	69.5	34.7	39		Cell 24	30	3	48	25
								2	4	251	62.8	203			60	5	139.6	104
								3	8	402.3	50.3	380			90	8	229.6	197
								4	6	203.2	33.9	186			120	12	338.6	284
								5	9	703.1	78.1	624			150	14	477.7	429
								6	4	345.9	86.5	326			180	8	414.6	406
															210	5	202.5	191
															240	1	110.7	106
															270	0	13.8	16
																										1.03354

## Sheet: Bbs4_DG-P21
Dendrograms and spine density:								Sholl:														Sholl
WT								WT						KO								KO
ID1	Cell 1	Order	Qty	Length total(µm)	mean	Spines		Cell 1	Radius(µm)	Intersections	Length(µm)	Spines		ID1	Cell 1	Order	Qty	Length total(µm)	mean	Spines		Cell 1	Radius(µm)	Intersections	Length(µm)	Spines
		1	2	52.9	26.5	45			0	0	0	0				1	1	15.2	15.2	5			0	0	0	0
		2	4	136.5	34.1	125			30	3	76.9	60				2	2	59	29.5	45			30	3	60.5	38
		3	8	436.6	54.6	435			60	9	242.9	199				3	4	261	65.2	213			60	7	219.1	159
		4	10	597.8	59.8	583			90	11	491.3	440				4	4	248	62	181			90	9	297.6	224
		5	6	406.5	67.7	389			120	11	487	535				5	2	96.7	48.4	67			120	4	238.1	178
		TTL	30	1630.3		1577			150	4	268.3	278				6	4	203.4	50.8	124			150	0	68	36
									180	0	63.9	65				TTL	17	883.3		635
	Cell 2	Order	Qty	Length total(µm)	mean	Spines		Cell 2	Radius(µm)	Intersections	Length(µm)	Spines			Cell 2	Order	Qty	Length total(µm)	mean	Spines		Cell 2	Radius(µm)	Intersections	Length(µm)	Spines
		1	1	0.6	0.6	0			0	0	0	0				1	1	1.9	1.9	0			0	0	0	0
		2	2	28.1	14.1	24			30	5	94.6	78				2	2	121.5	60.7	93			30	3	85.7	62
		3	3	96	32	135			60	7	227.6	241				3	4	182.5	45.6	111			60	4	117.3	84
		4	4	255.3	63.8	286			90	7	273.5	337				4	6	287.4	47.9	213			90	8	258.1	165
		5	6	323.9	54	317			120	3	225.4	224				5	2	79.9	40	50			120	3	277.1	190
		6	4	176.3	44.1	183			150	0	59.3	65				6	2	117.1	58.6	68			150	0	52.1	34
		TTL	20	880.2		945										TTL	17	790.3		535
	Cell 3	Order	Qty	Length total(µm)	mean	Spines		Cell 3	Radius(µm)	Intersections	Length(µm)	Spines			Cell 3	Order	Qty	Length total(µm)	mean	Spines		Cell 3	Radius(µm)	Intersections	Length(µm)	Spines
		1	3	37.5	12.5	23			0	0	0	0				1	1	12.2	12.2	10			0	0	0	0
		2	6	409.2	68.2	323			30	7	165.7	106				2	2	62.1	31	41			30	3	54.3	36
		3	6	345.5	57.6	269			60	12	395.5	306				3	4	223.1	55.8	183			60	8	189	128
		4	4	223.7	55.9	158			90	9	456.2	333				4	4	216.4	54.1	144			90	8	284.2	220
		5	4	204.9	51.2	147			120	2	167.2	138				5	6	336.7	56.1	216			120	6	254.8	157
		TTL	23	1220.8		920			150	0	36.2	37				6	4	122.3	30.6	63			150	3	178.4	109
																TTL	21	972.8		657			180	0	12	7
ID2	Cell 4	Order	Qty	Length total(µm)	mean	Spines		Cell 4	Radius(µm)	Intersections	Length(µm)	Spines			Cell 4	Order	Qty	Length total(µm)	mean	Spines		Cell 4	Radius(µm)	Intersections	Length(µm)	Spines
		1	1	2	2	0			0	0	0	0				1	1	1.3	1.3	0			0	0	0	0
		2	2	35.4	17.7	30			30	4	121.8	100				2	2	43.4	21.7	29			30	3	86.4	57
		3	4	174.3	43.6	158			60	6	201	182				3	4	193.6	48.4	153			60	7	201.2	140
		4	6	396	66	401			90	7	276.7	263				4	4	163.9	41	115			90	10	293.1	215
		5	8	430.9	53.9	416			120	4	323	326				5	8	292.5	36.6	201			120	0	173.8	121
		TTL	21	1038.6		1005			150	2	111.2	128				6	2	59.7	29.8	35
									180	0	4.9	6				TTL	21	754.4		533
	Cell 5	Order	Qty	Length total(µm)	mean	Spines		Cell 5	Radius(µm)	Intersections	Length(µm)	Spines				Order	Qty	Length total(µm)	mean	Spines			Radius(µm)	Intersections	Length(µm)	Spines
		1	1	8.9	8.9	4			0	0	0	0			Cell 5	1	1	15.2	15.2	5		Cell 5	0	0	0	0
		2	2	45.4	22.7	59			30	5	101.5	96				2	2	59	29.5	45			30	3	60.5	38
		3	4	140	35	139			60	9	291.9	288				3	4	261	65.2	213			60	7	219.1	159
		4	6	335.1	55.9	386			90	10	376.8	399				4	4	248	62	181			90	9	297.6	224
		5	6	409.5	68.3	417			120	5	285.6	318				5	2	96.7	48.4	67			120	4	238.1	178
		6	2	186.1	93	178			150	0	69.2	82				6	4	203.4	50.8	124			150	0	68	36
		TTL	21	1125		1183										TTL	17	883.3		635
	Cell 6	Order	Qty	Length total(µm)	mean	Spines		Cell 6	Radius(µm)	Intersections	Length(µm)	Spines		ID2	Cell 6	Order	Qty	Length total(µm)	mean	Spines		Cell 6	Radius(µm)	Intersections	Length(µm)	Spines
		1	1	8.1	8.1	3			0	0	0	0				1	1	13.9	13.9	5			0	0	0	0
		2	2	103.8	51.9	146			30	4	92.8	83				2	2	84.8	42.4	58			30	4	65.5	30
		3	4	213	53.3	259			60	9	291.5	384				3	4	151.5	37.9	93			60	7	231.1	157
		4	4	186.4	46.6	243			90	10	373.5	488				4	4	153.8	38.4	101			90	10	318.7	215
		5	6	267.3	44.6	353			120	6	300.2	364				5	6	503.3	83.9	343			120	6	341.3	219
		6	6	267.4	44.6	351			150	1	111.8	170				6	4	246.8	61.7	133			150	3	152.7	85
		7	2	143.8	71.9	164			180	0	20.1	30				TTL	21	1154.1		733			180	0	44.7	27
		TTL	25	1189.8		1519
	Cell 7	Order	Qty	Length total(µm)	mean	Spines		Cell 7	Radius(µm)	Intersections	Length(µm)	Spines			Cell 7	Order	Qty	Length total(µm)	mean	Spines		Cell 7	Radius(µm)	Intersections	Length(µm)	Spines
		1	1	8.6	8.6	5			0	0	0	0				1	2	33.5	16.8	23			0	0	0	0
		2	2	22.2	11.1	16			30	4	98.9	89				2	4	198.7	49.7	125			30	4	101.2	62
		3	4	139.8	34.9	166			60	9	259	321				3	8	513.4	64.2	360			60	8	261.6	164
		4	8	404.2	50.5	529			90	7	404.9	552				4	4	203.8	50.9	126			90	9	325.1	217
		5	8	318	39.8	413			120	2	203.4	281				5	4	204.1	51	148			120	9	316.6	229
		6	4	124.1	31	180			150	1	48.3	62				6	4	147	36.8	97			150	3	243.1	163
		TTL	27	1016.9		1309			180	0	2.4	4				TTL	26	1300.5		879			180	1	42	34
																							210	0	10.9	10
ID3	Cell 8	Order	Qty	Length total(µm)	mean	Spines		Cell 8	Radius(µm)	Intersections	Length(µm)	Spines			Cell 8	Order	Qty	Length total(µm)	mean	Spines		Cell 1	Radius(µm)	Intersections	Length(µm)	Spines
		1	1	5.4	5.4	4			0	0	0	0				1	1	8.7	8.7	2			0	0	0	0
		2	2	72.1	36	65			30	5	86.3	77				2	2	24.6	12.3	19			30	5	79.1	43
		3	4	101.7	25.4	135			60	8	266.9	290				3	4	116.8	29.2	68			60	11	310	179
		4	8	428.8	53.6	534			90	11	388.5	525				4	8	326.4	40.8	206			90	8	351.3	201
		5	10	512.6	51.3	670			120	11	417.2	526				5	8	188.4	23.5	123			120	1	225.5	157
		6	6	369.3	61.6	443			150	5	245.1	304				6	6	303.8	50.6	162			150	0	2.7	0
		TTL	31	1489.9		1851			180	0	85.8	129				TTL	29	968.7		580
	Cell 9	Order	Qty	Length total(µm)	mean	Spines		Cell 9	Radius(µm)	Intersections	Length(µm)	Spines			Cell 9	Order	Qty	Length total(µm)	mean	Spines		Cell 2	Radius(µm)	Intersections	Length(µm)	Spines
		1	1	2.2	2.2	0			0	0	0	0				1	2	6.2	3.1	4			0	0	0	0
		2	2	14.8	7.4	14			30	4	85.2	72				2	4	222.7	55.7	164			30	7	143.8	104
		3	4	220.6	55.1	245			60	6	201.4	223				3	4	199.6	49.9	141			60	8	315.9	249
		4	8	273.9	34.2	330			90	10	354.3	402				4	6	357.1	59.5	259			90	4	238.9	141
		5	12	633.8	52.8	737			120	8	429.4	569				5	2	132	66	98			120	2	147.8	116
		6	4	122.3	30.6	155			150	0	197.3	215				TTL	18	917.6		666			150	1	40	29
		TTL	31	1267.6		1481																	180	0	31.3	27
	Cell 10	Order	Qty	Length total(µm)	mean	Spines		Cell 10	Radius(µm)	Intersections	Length(µm)	Spines		ID3	Cell 10	Order	Qty	Length total(µm)	mean	Spines		Cell 3	Radius(µm)	Intersections	Length(µm)	Spines
		1	2	18.6	9.3	12			0	0	0	0				1	1	0.8	0.8	0			0	0	0	0
		2	4	257.7	64.4	266			30	5	120.2	99				2	2	35.2	17.6	27			30	4	80.9	55
		3	6	278.1	46.4	362			60	8	256.4	291				3	4	258.2	64.5	217			60	5	200.4	167
		4	8	439.5	54.9	560			90	9	349.8	479				4	6	355	59.2	253			90	6	209.6	162
		5	6	302.1	50.4	386			120	8	306.3	401				5	2	133.1	66.5	84			120	6	225.1	156
		6	4	132.6	33.1	181			150	3	176.1	234				6	2	76.5	38.3	50			150	0	142.8	91
		TTL	30	1428.6		1767			180	5	147.7	164				TTL	17	858.8		631
									210	0	72.3	99
															Cell 11	Order	Qty	Length total(µm)	mean	Spines		Cell 4	Radius(µm)	Intersections	Length(µm)	Spines
																1	1	5.4	5.4	4			0	0	0	0
																2	2	17.9	9	11			30	4	98	67
																3	4	261.2	65.3	200			60	7	191.5	140
																4	6	443.9	74	356			90	8	275.3	225
																5	2	119.4	59.7	82			120	6	263.2	212
																6	2	102.6	51.3	67			150	0	122.5	76
																TTL	17	950.4		720
															Cell 12	Order	Qty	Length total(µm)	mean	Spines		Cell 5	Radius(µm)	Intersections	Length(µm)	Spines
																1	1	2.5	2.5	0			0	0	0	0
																2	2	41.9	21	25			30	4	71.7	39
																3	4	180.1	45	108			60	6	204.7	121
																4	6	372.9	62.1	219			90	9	248.3	137
																5	6	146.7	24.5	78			120	8	303.2	168
																6	6	331.7	55.3	180			150	3	193.4	116
																TTL	25	1075.8		610			180	0	54.6	29
															Cell 13	Order	Qty	Length total(µm)	mean	Spines		Cell 6	Radius(µm)	Intersections	Length(µm)	Spines
																1	1	3.7	3.7	3			0	0	0	0
																2	2	51.1	25.55	38			30	4	114.5	81
																3	4	249.9	62.475	195			60	7	223.3	165
																4	6	382.9	63.8167	277			90	11	410.2	292
																5	8	277.9	34.7375	195			120	6	325.9	222
																6	8	305	38.125	182			150	2	172.9	116
																TTL	29	1270.5		890			180	0	23.7	14
															Cell 14	Order	Qty	Length total(µm)	mean	Spines		Cell 7	Radius(µm)	Intersections	Length(µm)	Spines
																1	2	37.1	18.6	26			0	0	0	0
																2	4	193.3	48.3	130			30	4	68	44
																3	6	441.6	73.6	262			60	7	219.6	127
																4	6	252.6	42.1	139			90	10	307.5	205
																5	4	219.5	54.9	126			120	8	387.3	222
																6	2	128.6	64.3	66			150	2	203.9	114
																TTL	24	1272.7		749			180	1	82.4	37
																							210	0	4	0
															Cell 15	Order	Qty	Length total(µm)	mean	Spines		Cell 8	Radius(µm)	Intersections	Length(µm)	Spines
																1	2	44	22	32			0	0	0	0
																2	3	94.2	31.4	83			30	3	80.9	64
																3	5	310.7	62.1	249			60	8	238.1	185
																4	6	269.1	44.8	219			90	7	266.6	214
																5	4	244.4	61.1	191			120	6	270.7	225
																TTL	20	962.4		774			150	1	104.4	86
																							180	0	1.6	0

## Sheet: Bbs5_DG_P21
WT	Name	Qty	Spines	Length(µm)	Density				Order	Qty	Length total(µm)	MEAN	Spines	Density				Radius(µm)	Intersections	Length(µm)	Spines	Density		KO	Name	Qty	Spines	Length(µm)	Density				Order	Qty	Length total(µm)	mean	Spines	Density				Radius(µm)	Intersections	Length(µm)	Spines	Density
ID1																								ID1
Cell 1	Dendrite	1	5606	2256.8	2.48405			Cell 1	1	1	16.9	16.9	6	0.35503			Cell 1	30	2	26.5	16	0.603774		Cell 1	Dendrite	1	788	773.9	1.01822			Cell 1	1	1	9.4	9.4	4	0.425532			Cell 1	30	0	0	0	0
									2	2	75.2	37.6	213	2.83245				60	5	153.4	479	3.12256											2	2	35.2	17.6	28	1.59091				60	5	211.7	186	0.878602
									3	4	366.6	91.7	903	2.46318				90	7	226.8	638	2.81305											3	4	195.5	48.9	173	3.53783				90	7	236.1	233	0.98687
									4	6	514.1	85.7	1331	2.58899				120	8	261.5	788	3.01338											4	6	349.3	58.2	370	6.35739				120	5	195.9	221	1.12813
									5	6	508	84.7	1314	2.58661				150	11	342.5	829	2.42044											5	4	184.6	46.1	213	4.62039				150	1	103.2	112	1.08527
									6	8	619.1	77.4	1499	2.42126				180	14	424.9	1073	2.5253																				180	0	27.1	36	1.32841
									7	2	156.7	78.3	340	2.16975				210	12	449.8	1011	2.24767
																		240	6	306.1	629	2.05488
																		270	0	65.2	143	2.19325
	Name	Qty	Spines	Length(µm)	Density				Order	Qty	Length total(µm)	mean	Spines	Density				Radius(µm)	Intersections	Length(µm)	Spines	Density		Cell 2	Name	Qty	Spines	Length(µm)	Density				Order	Qty	Length total(µm)	mean	Spines	Density				Radius(µm)	Intersections	Length(µm)	Spines	Density
Cell 2	Dendrite	1	3039	1631.2	1.86305			Cell 2	1	1	10.9	10.9	17	1.55963			Cell 2	30	2	26.7	39	1.46067			Dendrite	1	675	719.2	0.938543			Cell 2	1	1	6.3	6.3	6	0.952381			Cell 2	30	1	1.7	1	0.588235
									2	2	174.1	87.1	281	1.61401				60	4	104.5	222	2.1244											2	2	23.4	11.7	16	1.36752				60	5	183.2	162	0.884279
									3	2	160.9	80.4	308	1.91423				90	6	168.7	299	1.77238											3	4	158.9	39.7	187	4.71033				90	8	276.6	247	0.892986
									4	2	84.9	42.4	184	17.6561				120	7	237.4	490	2.06403											4	6	329.7	54.9	240	4.37158				120	2	221.8	232	1.04599
									5	4	347.9	87	663	1.90572				150	9	270.2	536	1.98372											5	4	201	50.3	226	4.49304				150	0	36	33	0.916667
									6	4	333.3	83.3	692	2.07621				180	9	278.7	529	1.8981
									7	6	519.2	86.5	894	1.72188				210	6	243	434	1.78601
																		240	4	174.2	305	1.75086		Cell 3	Name	Qty	Spines	Length(µm)	Density				Order	Qty	Length total(µm)	mean	Spines	Density
																		270	1	104.7	163	1.55683			Dendrite	1	1888	1614.9	1.16911			Cell 3	1	1	8.6	8.6	22	2.55814				Radius(µm)	Intersections	Length(µm)	Spines	Density
																		300	0	23.2	22	0.948276											2	2	96.9	48.4	151	3.11983			Cell 3	30	2	14.1	28	1.98582
																																	3	4	261.5	65.4	339	5.18349				60	3	90	144	1.6
	Name	Qty	Spines	Length(µm)	Density				Order	Qty	Length total(µm)	mean	Spines	Density				Radius(µm)	Intersections	Length(µm)	Spines	Density											4	8	1008.1	126	1202	9.53968				90	4	103.8	145	1.39692
Cell 3	Dendrite	1	5254	2834.4	1.85366			Cell 3	1	1	11.6	11.6	25	2.15517			Cell 3	30	4	43.6	80	1.83486											5	4	239.8	60	174	2.9				120	6	158.6	206	1.29887
									2	2	18.6	9.3	33	1.77419				60	8	199.8	425	2.12713																				150	7	218.9	282	1.28826
									3	4	370.2	92.5	716	1.93409				90	9	291.6	564	1.93416																				180	8	267.9	369	1.37738
									4	6	378.1	63	688	1.81962				120	10	304	609	2.00329																				210	7	244.5	292	1.19427
									5	7	733.9	104.8	1473	2.00709				150	11	344.2	731	2.12377																				240	6	212.2	191	0.900094
									6	6	474.2	79	956	2.01603				180	11	340.5	675	1.98238																				270	4	162.4	133	0.818966
									7	8	847.9	106	1363	1.6075				210	13	404.6	691	1.70786																				300	3	113.2	81	0.715548
																		240	11	399.3	650	1.62785																				330	0	29.4	17	0.578231
																		270	6	260.7	422	1.61872
																		300	4	156.2	253	1.61972
																		330	2	79.7	138	1.73149		Cell 4	Name	Qty	Spines	Length(µm)	Density				Order	Qty	Length total(µm)	mean	Spines	Density				Radius(µm)	Intersections	Length(µm)	Spines	Density
																		360	0	10.1	16	1.58416			Dendrite	1	1928	1556	1.23907			Cell 4	1	1	24.2	24.2	18	0.743802			Cell 4	30	1	22	17	0.772727
																																	2	2	70.9	35.4	92	2.59887				60	3	86.4	102	1.18056
																																	3	4	319.2	79.8	361	4.52381				90	6	150.8	199	1.31963
	Name	Qty	Spines	Length(µm)	Density				Order	Qty	Length total(µm)	mean	Spines	Density				Radius(µm)	Intersections	Length(µm)	Spines	Density											4	4	250.7	62.7	309	4.92823				120	9	274.5	331	1.20583
Cell 4	Dendrite	1	4849	1985.1	2.4427			Cell 4	1	1	11	11	21	1.90909			Cell 4	30	3	24.5	30	1.22449											5	8	441.3	55.2	519	9.40217				150	10	340.9	458	1.3435
									2	2	88.1	44.1	225	2.55392				60	4	119.8	296	2.47078											6	4	211.3	52.8	288	5.45455				180	6	309.6	358	1.15633
									3	4	325.4	81.4	841	2.58451				90	6	140	324	2.31429											7	4	238.3	59.6	341	5.72148				210	6	175.1	210	1.19931
									4	6	573.9	95.6	1421	2.47604				120	7	204	538	2.63725																				240	4	156.7	211	1.34652
									5	6	665.8	111	1598	2.40012				150	6	218	562	2.57798																				270	0	40	42	1.05
									6	2	164.2	82.1	403	2.45432				180	8	222	577	2.5991
									7	2	156.7	78.3	340	2.16975				210	8	249.6	641	2.56811
																		240	6	233.1	612	2.62548		Cell 5	Name	Qty	Spines	Length(µm)	Density				Order	Qty	Length total(µm)	mean	Spines	Density				Radius(µm)	Intersections	Length(µm)	Spines	Density
																		270	4	166.6	371	2.22689			Dendrite	1	1504	1385.1	1.08584			Cell 5	1	1	4.6	4.6	9	1.95652			Cell 5	30	2	16.3	26	1.59509
																		300	3	125	290	2.32											2	2	80.1	40	120	3				60	3	106.3	130	1.22295
																		330	4	131	299	2.28244											3	4	187.3	46.8	219	4.67949				90	6	155.9	185	1.18666
																		360	3	119.7	237	1.97995											4	8	676.7	84.6	737	8.71158				120	9	248.2	307	1.23691
																		390	0	31.5	72	2.28571											5	6	355.1	59.2	356	6.01351				150	8	277.6	309	1.11311
																																	6	2	81.3	40.6	63	1.55172				180	7	305.5	306	1.00164
																																										210	2	235.1	206	0.876223
	Name	Qty	Spines	Length(µm)	Density				Order	Qty	Length total(µm)	mean	Spines	Density				Radius(µm)	Intersections	Length(µm)	Spines	Density																				240	0	40.2	35	0.870647
Cell 5	Dendrite	1	4603	2129.2	2.16184			Cell 5	1	1	16.9	16.9	6	0.35503			Cell 5	30	1	1.2	0	0		ID2
									2	2	36	18	105	2.91667				60	5	136.8	364	2.66082
									3	4	403.6	100.9	1065	2.63875				90	7	232.1	634	2.73158		Cell 6	Name	Qty	Spines	Length(µm)	Density				Order	Qty	Length total(µm)	mean	Spines	Density				Radius(µm)	Intersections	Length(µm)	Spines	Density
									4	4	307.2	76.8	804	2.61719				120	8	256.3	600	2.34101			Dendrite	1	864	893.5	0.966984			Cell 6	1	1	15.7	15.7	12	0.764331			Cell 6	30	3	48	29	0.604167
									5	4	310.3	77.6	685	2.20754				150	11	324.7	733	2.25747											2	2	26.6	13.3	17	0.639098				60	5	169.2	161	0.951537
									6	8	591.4	73.9	1134	1.91748				180	13	415.9	843	2.02693											3	4	294.8	73.7	248	0.841248				90	6	240.8	223	0.92608
									7	6	463.8	77.3	804	1.73351				210	10	370.6	744	2.00756											4	2	54.4	27.2	63	1.15809				120	5	217.9	226	1.03717
																		240	7	261	475	1.81992											5	4	383.3	95.8	398	1.03835				150	2	147	166	1.12925
																		270	2	117.2	194	1.65529											6	2	118.7	59.4	126	1.0615				180	1	51.2	41	0.800781
																		300	0	13.3	16	1.20301																				210	0	19.4	18	0.927835
ID2
	Name	Qty	Spines	Length(µm)	Density				Order	Qty	Length total(µm)	mean	Spines	Density				Radius(µm)	Intersections	Length(µm)	Spines			Cell 7	Name	Qty	Spines	Length(µm)	Density				Order	Qty	Length total(µm)	mean	Spines	Density				Radius(µm)	Intersections	Length(µm)	Spines	Density
Cell 6	Dendrite	1	1306	1191.6	1.09601			Cell 6	1	1	11.9	11.9	6	0.504202			Cell 6	30	4	101.7	81	Density			Dendrite	1	878	1195.6	0.734359			Cell 7	1	1	3.7	3.7	3	0.810811			Cell 7	30	6	133.3	78	0.585146
									2	2	7.7	3.9	5	0.649351				60	6	204	239	1.17157											2	2	20.9	10.5	15	0.717703				60	8	260.7	200	0.767165
									3	4	231.5	57.9	254	1.09719				90	7	245.9	274	1.11427											3	4	196.4	49.1	151	0.768839				90	9	328.9	269	0.817878
									4	4	337.4	84.4	390	1.1559				120	7	267.6	292	1.09118											4	4	161.6	40.4	135	0.835396				120	6	293.8	214	0.728387
									5	4	227.6	56.9	250	1.09842				150	4	190.4	218	1.14496											5	8	566.6	70.8	413	0.728909				150	2	113.3	82	0.723742
									6	4	205.4	51.3	228	1.11003				180	2	100.6	120	1.19284											6	2	119.5	59.8	82	0.686192				180	0	65.5	35	0.534351
									7	4	170.1	42.5	173	1.01705				210	0	81.4	82	1.00737												2	126.8	63.4	79	0.623028
																								Cell 8	Name	Qty	Spines	Length(µm)	Density				Order	Qty	Length total(µm)	mean	Spines	Density				Radius(µm)	Intersections	Length(µm)	Spines	Density
																									Dendrite	1	1086	1318.5	0.823663			Cell 8	1	1	3.6	3.6	5	1			Cell 8	30	4	118.3	80	0.676247
	Name	Qty	Spines	Length(µm)	Density				Order	Qty	Length total(µm)	mean	Spines	Density				Radius(µm)	Intersections	Length(µm)	Spines	Density											2	2	169	84.5	207	0.5				60	6	222.2	224	1.0081
Cell 7	Dendrite	1	1163	1258.6	0.924043			Cell 7	1	1	2.8	2.8	2	0.714286			Cell 7	30	5	92.2	75	0.813449											3	4	311.2	77.8	264	0.25				90	8	282.1	245	0.868486
									2	2	25.6	12.8	19	0.742188				60	9	244.4	240	0.981997											4	4	133.4	33.4	104	0.250375				120	8	313.4	246	0.784939
									3	4	252.3	63.1	252	0.998811				90	9	313.2	296	0.945083											5	8	368.7	46.1	296	0.125034				150	5	211.1	166	0.786357
									4	8	524.1	65.5	452	0.862431				120	8	316.7	283	0.89359											6	6	332.6	55.4	210	0.166566				180	2	129.3	103	0.796597
									5	4	218.8	54.7	208	0.95064				150	3	191.2	175	0.915272																				210	0	42.1	22	0.522565
									6	4	234.9	58.7	230	0.97914				180	1	89.2	84	0.941704
																		210	0	11.7	10	0.854701
																								Cell 9	Name	Qty	Spines	Length(µm)	Density				Order	Qty	Length total(µm)	mean	Spines	Density				Radius(µm)	Intersections	Length(µm)	Spines	Density
	Name	Qty	Spines	Length(µm)	Density				Order	Qty	Length total(µm)	mean	Spines	Density				Radius(µm)	Intersections	Length(µm)	Spines	Density			Dendrite	1	1354	992.5	1.36423			Cell 9	1	1	3.9	3.9	4	1			Cell 9	30	3	61.9	61	0.98546
Cell 8	Dendrite	1	1171	1209.4	0.968249			Cell 8	1	1	12.3	12.3	6	0.487805			Cell 8	30	3	33.4	20	0.598802											2	2	43.3	21.6	40	0.498845				60	6	207.6	252	1.21387
									2	2	27.9	13.9	26	0.9319				60	8	219.8	205	0.932666											3	4	239.9	60	298	0.250104				90	8	271.8	404	1.48639
									3	4	143.1	35.8	149	1.04123				90	10	302.6	274	0.905486											4	4	272.4	68.1	393	0.25				120	7	269.7	372	1.37931
									4	6	340.5	56.7	335	0.983847				120	8	348.3	344	0.987654											5	4	298.6	74.7	432	0.250167				150	3	137.7	200	1.45243
									5	8	482	60.3	451	0.935685				150	5	202.9	219	1.07935											6	2	134.4	67.2	187	0.5				180	0	43.7	65	1.48741
									6	2	203.6	101.8	204	1.00196				180	1	98.7	106	1.07396
																		210	0	3.7	3	0.810811
																								Cell 10	Name	Qty	Spines	Length(µm)	Density				Order	Qty	Length total(µm)	mean	Spines	Density				Radius(µm)	Intersections	Length(µm)	Spines	Density
																									Dendrite	1	878	1195.6	0.734359			Cell 10	1	1	3.7	3.7	3	0.810811			Cell 10	30	6	133.3	78	0.585146
	Name	Qty	Spines	Length(µm)	Density				Order	Qty	Length total(µm)	mean	Spines	Density				Radius(µm)	Intersections	Length(µm)	Spines	Density											2	2	20.9	10.5	15	0.717703				60	8	260.7	200	0.767165
Cell 9	Dendrite	2	1777	1663.1	1.06849			Cell 9	1	2	20.8	10.4	24	1.15385			Cell 9	30	6	130.2	118	0.906298											3	4	196.4	49.1	151	0.768839				90	9	328.9	269	0.817878
									2	4	173.8	43.4	158	0.909091				60	8	273.6	276	1.00877											4	4	161.6	40.4	135	0.835396				120	6	293.8	214	0.728387
									3	6	309.9	51.7	349	1.12617				90	11	353.1	399	1.12999											5	8	566.6	70.8	413	0.728909				150	2	113.3	82	0.723742
									4	10	625.3	62.5	692	1.10667				120	12	425	463	1.08941											6	2	119.5	59.8	82	0.686192				180	0	65.5	35	0.534351
									5	4	280.1	70	315	1.1246				150	7	337.6	373	1.10486		ID3										2	126.8	63.4	79	0.623028
									6	4	253.2	63.3	239	0.943918				180	0	143.7	148	1.02992
																								Cell 11	Name	Qty	Spines	Length(µm)	Density				Order	Qty	Length total(µm)	mean	Spines	Density				Radius(µm)	Intersections	Length(µm)	Spines	Density
																									Dendrite	1	468	611.1	0.765832			Cell 11	1	1	9.8	9.8	6	0.612245			Cell 11	30	2	50.3	33	0.656064
	Name	Qty	Spines	Length(µm)	Density				Order	Qty	Length total(µm)	mean	Spines	Density				Radius(µm)	Intersections	Length(µm)	Spines	Density											2	1	3.1	3.1	2	0.645161				60	4	147	104	0.707483
Cell 10	Dendrite	2	952	921.8	1.03276			Cell 10	1	2	55.8	27.9	65	1.16487			Cell 10	30	4	84.2	78	0.926366											3	2	44.7	22.3	35	0.782998				90	4	145.7	160	1.09815
									2	4	253.9	63.5	272	1.07129				60	10	237.6	253	1.06481											4	4	462	115.5	374	0.809524				120	5	176.1	103	0.584895
									3	4	212.3	53.1	255	1.20113				90	8	303.1	336	1.10855											5	2	91.6	45.8	51	0.556769				150	1	88.2	65	0.736961
									4	2	76.1	38.1	100	1.31406				120	4	209.2	205	0.979924											6									180	0	3.8	3	0.789474
									5	2	117.2	58.6	104	0.887372				150	1	85.1	78	0.916569
									6	2	206.6	103.3	156	0.755082				180	0	2.7	2	0.740741
																								Cell 12	Name	Qty	Spines	Length(µm)	Density				Order	Qty	Length total(µm)	mean	Spines	Density				Radius(µm)	Intersections	Length(µm)	Spines	Density
																									Dendrite	1	1049	1317	0.796507			Cell 12	1	1	5	5	5	1			Cell 12	30	5	74.3	61	0.820996
																																	2	2	17	8.5	19	1.11765				60	7	231.2	135	0.58391
																																	3	4	116.6	29.2	67	0.574614				90	9	282.4	223	0.78966
ID3																																	4	8	912	114	782	0.857456				120	8	333.4	296	0.887822
	Name	Qty	Spines	Length(µm)	Density				Order	Qty	Length total(µm)	mean	Spines	Density				Radius(µm)	Intersections	Length(µm)	Spines	Density											5	4	266.3	66.6	176	0.660909				150	4	286.8	233	0.812413
Cell 11	Dendrite	1	1834	1280.6	1.43214			Cell 11	1	1	26	26	23	0.884615			Cell 11	30	1	26	23	0.884615											6									180	1	105.6	95	0.899621
									2	2	194	97	257	1.32474				60	4	118.8	131	1.10269																				210	0	3.3	6	1.81818
									3	2	30.3	15.2	42	1.38614				90	7	237.6	332	1.39731
									4	4	195.2	48.8	309	1.58299				120	9	305.8	464	1.51733
									5	6	499.6	83.3	721	1.44315				150	6	261.9	411	1.5693		Cell 13	Name	Qty	Spines	Length(µm)	Density				Order	Qty	Length total(µm)	mean	Spines	Density				Radius(µm)	Intersections	Length(µm)	Spines	Density
									6	6	335.5	55.9	482	1.43666				180	6	222.3	314	1.41251			Dendrite	1	1010	1155.2	0.874307			Cell 13	1	1	13	13	8	0.615385			Cell 13	30	6	77.1	55	0.713359
																		210	0	108.2	159	1.4695											2	2	28.6	14.3	26	0.909091				60	9	226.7	165	0.727834
																																	3	4	170.8	42.7	160	0.936768				90	10	339.9	255	0.750221
																																	4	6	394.6	65.8	391	0.990877				120	8	306.4	326	1.06397
																																	5	4	389.5	97.4	280	0.71887				150	2	181.6	183	1.00771
																																	6	2	158.7	79.4	145	0.913674				180	0	23.4	26	1.11111
	Name	Qty	Spines	Length(µm)	Density				Order	Qty	Length total(µm)	mean	Spines	Density				Radius(µm)	Intersections	Length(µm)	Spines	Density
Cell 12	Dendrite	2	2051	1841.3	1.11389			Cell 12	1	2	14.1	7.1	14	0.992908			Cell 12	30	5	117.2	115	0.981229
									2	4	290.9	72.7	322	1.10691				60	8	265.3	323	1.21749		Cell 14	Name	Qty	Spines	Length(µm)	Density				Order	Qty	Length total(µm)	mean	Spines	Density				Radius(µm)	Intersections	Length(µm)	Spines	Density
									3	8	401	50.1	448	1.11721				90	12	379.7	437	1.15091			Dendrite	1	1119	1012.8	1.10486			Cell 14	1	1	1.2	1.2	2	1.66667			Cell 14	30	2	71	88	1.23944
									4	8	526	65.7	612	1.1635				120	10	408.1	467	1.14433											2	2	106.5	53.3	146	1.37089				60	5	146	173	1.18493
									5	4	521.2	130.3	577	1.10706				150	9	360.7	381	1.05628											3	4	356	89	383	1.07584				90	6	201.8	215	1.06541
									6	2	46.3	23.2	40	0.863931				180	5	232.8	256	1.09966											4	4	383.3	95.8	414	1.08009				120	5	202.7	234	1.15442
									7	2	41.8	20.9	38	0.909091				210	0	77.6	72	0.927835											5	2	165.8	82.9	174	1.04946				150	4	145.4	153	1.05227
																																	6									180	3	134.1	151	1.12603
																																										210	2	89.4	86	0.961969
																																										240	0	22.4	19	0.848214
	Name	Qty	Spines	Length(µm)	Density				Order	Qty	Length total(µm)	mean	Spines	Density				Radius(µm)	Intersections	Length(µm)	Spines	Density
Cell 13	Dendrite	1	1436	1084.9	1.32362			Cell 13	1	1	20.5	20.5	25	1.21951			Cell 13	30	2	34.8	38	1.09195		Cell 15	Name	Qty	Spines	Length(µm)	Density				Order	Qty	Length total(µm)	mean	Spines	Density				Radius(µm)	Intersections	Length(µm)	Spines	Density
									2	2	65.8	32.9	65	0.987842				60	4	116.7	137	1.17395			Dendrite	1	1094	926.4	1.18092			Cell 15	1	1	2.8	2.8	4	1.42857			Cell 15	30	5	109.4	91	0.83181
									3	4	277.5	69.4	408	1.47027				90	4	175	246	1.40571											2	2	37.9	19	35	0.923483				60	6	203.1	264	1.29985
									4	4	332.4	83.1	477	1.43502				120	6	180.1	237	1.31594											3	4	278.1	69.5	358	1.28731				90	7	244.7	310	1.26686
									5	4	388.7	97.2	461	1.186				150	6	216.5	315	1.45497											4	4	229.8	57.5	286	1.24456				120	6	254.8	295	1.15777
																		180	4	170.3	235	1.37992											5	2	112.7	56.3	134	1.189				150	1	97.9	113	1.15424
																		210	2	120.8	143	1.18377											6	4	265.2	66.3	277	1.04449				180	0	16.5	21	1.27273
																		240	1	66.4	77	1.15964
																		270	0	4.3	8	1.86047		ID4
																								Cell 16	Name	Qty	Spines	Length(µm)	Density			Cell 16	Order	Qty	Length total(µm)	MEAN	Spines	Density				Radius(µm)	Intersections	Length(µm)	Spines	Density
																									Dendrite	1	1434	1448.1	0.990263				1	1	3.6	3.6	1	0.277778			Cell 16	30	3	57.1	40	0.700525
																																	1	1	10.5	10.5	4	0.380952				60	3	111.1	118	1.06211
	Name	Qty	Spines	Length(µm)	Density				Order	Qty	Length total(µm)	mean	Spines	Density				Radius(µm)	Intersections	Length(µm)	Spines	Density											2	2	55.1	27.6	53	0.961887				90	6	222	242	1.09009
Cell 14	Dendrite	1	1213	1153	1.05204			Cell 14	1	1	2.7	2.7	3	1.11111			Cell 14	30	3	79	69	0.873418											3	4	162.1	40.5	151	0.931524				120	11	270.3	270	0.99889
									2	2	224.9	112.5	236	1.04936				60	4	144.7	149	1.02972											4	7	484.2	69.2	523	1.08013				150	9	365.1	361	0.98877
									3	2	176.8	88.4	155	0.876697				90	6	170.7	191	1.11892											5	8	425.5	53.2	413	0.970623				180	5	228.5	214	0.936543
									4	2	103.8	51.9	124	1.19461				120	6	201.8	243	1.20416											6	4	310.8	77.7	290	0.933076				210	2	138.9	137	0.986321
									5	4	349.2	87.3	416	1.19129				150	5	186	197	1.05914																				240	1	45.8	43	0.938865
									6	4	295.5	73.9	279	0.944162				180	4	177.8	181	1.018																				270	0	9.2	9	0.978261
																		210	2	126.1	104	0.824742
																		240	1	49	57	1.16327
																		270	0	18	22	1.22222
																								Cell 17	Name	Qty	Spines	Length(µm)	Density				Order	Qty	Length total(µm)	mean	Spines	Density				Radius(µm)	Intersections	Length(µm)	Spines	Density
																									Dendrite	1	959	1154.1	0.830951			Cell 17	1	1	0	0	0	0			Cell 17	30	5	53.8	41	0.762082
																																	2	2	12.4	6.2	5	0.403226				60	8	231.6	176	0.759931
	Name	Qty	Spines	Length(µm)	Density				Order	Qty	Length total(µm)	mean	Spines	Density				Radius(µm)	Intersections	Length(µm)	Spines	Density											3	4	110.7	27.7	94	0.849142				90	10	311.2	246	0.790488
Cell 15	Dendrite	1	1819	1639.7	1.10935			Cell 15	1	1	28.3	28.3	18	0.636042			Cell 15	30	1	20.2	10	0.49505											4	7	471.8	67.4	370	0.784231				120	7	305.7	233	0.762185
									2	2	33.1	16.5	29	0.876133				60	6	130.4	119	0.912577											5	6	415	69.2	377	0.908434				150	3	165.5	173	1.04532
									3	4	248.5	62.1	231	0.929577				90	8	255.1	313	1.22697											6	2	144	72	113	0.784722				180	2	75.4	82	1.08753
									4	6	611.6	101.9	695	1.13636				120	8	307.9	364	1.1822																				210	0	10.8	8	0.740741
									5	6	562.4	93.7	666	1.18421				150	9	327.4	340	1.03849
									6	2	155.8	77.9	180	1.15533				180	7	281.8	315	1.11781
																		210	4	242	269	1.11157
																		240	1	74.3	89	1.19785		Cell 18	Name	Qty	Spines	Length(µm)	Density				Order	Qty	Length total(µm)	mean	Spines	Density				Radius(µm)	Intersections	Length(µm)	Spines	Density
ID4																		270	0	0.5	0	0			Dendrite	1	1534	1844.1	0.831842			Cell 18	1	1	0.6	0.6	0	0			Cell 18	30	3	36.6	18	0.491803
																																	2	2	16.4	8.2	8	0.487805				60	6	164.4	125	0.760341
	Name	Qty	Spines	Length(µm)	Density				Order	Qty	Length total(µm)	MEAN	Spines	Density																			3	4	204.2	51.1	186	0.910872				90	7	208.9	169	0.809
Cell 16	Dendrite	1	1386	1225	1.13143			Cell 16	1	1	3.2	3.2	0	0			Cell 16																4	8	700.3	87.5	539	0.76967				120	8	248.4	225	0.905797
									2	2	25.9	12.9	32	1.23552				30	4	68.7	63	0.917031											5	10	631.1	63.1	589	0.933291				150	11	337	274	0.813056
									3	4	110	27.5	117	1.06364				60	8	189	215	1.13757											6	4	291.4	72.9	212	0.727522				180	12	411.3	351	0.853392
									4	7	498.1	71.2	619	1.24272				90	9	266.7	304	1.13986																				210	6	315.8	287	0.908803
									5	8	404.1	50.5	414	1.0245				120	9	354.8	398	1.12176																				240	1	94.8	74	0.780591
									6	2	59.5	29.8	64	1.07563				150	6	283.4	321	1.13267																				270	0	27	11	0.407407
									7	2	124.2	62.1	140	1.12721				180	0	62.4	85	1.36218
																								Cell 19	Name	Qty	Spines	Length(µm)	Density				Order	Qty	Length total(µm)	mean	Spines	Density				Radius(µm)	Intersections	Length(µm)	Spines	Density
																									Dendrite	1	765	1002.3	0.763245			Cell 19	1	1	6.8	6.8	4	0.588235			Cell 19	30	2	14.1	5	0.35461
	Name	Qty	Spines	Length(µm)	Density				Order	Qty	Length total(µm)	MEAN	Spines	Density				Radius(µm)	Intersections	Length(µm)	Spines	Density											2	2	68.9	34.5	37	0.53701				60	4	104	66	0.634615
Cell 17	Dendrite	1	2222	1903.6	1.16726			Cell 17	1	1	15.7	15.7	18	1.1465			Cell 17	30	0	0	0	0											3	4	260.8	65.2	251	0.962423				90	7	222.6	165	0.74124
									2	2	78.7	39.3	139	1.7662				60	4	10.7	11	1.02804											4	4	208.8	52.2	151	0.72318				120	8	272.7	236	0.86542
									3	4	323.8	81	399	1.23224				90	4	154.1	248	1.60934											5	4	209.9	52.5	146	0.695569				150	5	236.2	183	0.774767
									4	8	477.7	59.7	574	1.20159				120	4	163.4	225	1.37699											6	2	162.1	81.1	111	0.684762				180	2	141.6	102	0.720339
									5	10	792.2	79.2	988	1.24716				150	7	208.8	210	1.00575											7	2	84.9	42.5	65	0.765607				210	0	11.1	8	0.720721
									6	3	215.6	71.9	226	1.04824				180	10	314.1	389	1.23846
																		210	11	379.1	464	1.22395
																		240	9	348.3	405	1.16279		Cell 20	Name	Qty	Spines	Length(µm)	Density				Order	Qty	Length total(µm)	mean	Spines	Density				Radius(µm)	Intersections	Length(µm)	Spines	Density
																		270	4	238.5	288	1.20755			Dendrite	1	1163	1385.5	0.839408			Cell 20	1	1	0	0	0	0			Cell 20	30	5	83	63	0.759036
																		300	1	79.8	98	1.22807											2	2	12.4	6.2	5	0.403226				60	7	209	171	0.818182
																		330	0	6.7	6	0.895522											3	4	160	40	133	0.83125				90	10	276.7	205	0.740875
																																	4	6	298.4	49.7	255	0.854558				120	8	320.8	232	0.723192
																																	5	8	602.6	75.3	462	0.766678				150	4	204.2	197	0.96474
																																	6	2	168	84	195	1.16071				180	4	146.5	131	0.894198
	Name	Qty	Spines	Length(µm)	Density				Order	Qty	Length total(µm)	mean	Spines	Density				Radius(µm)	Intersections	Length(µm)	Spines	Density											7	2	144	72	113	0.784722				210	3	98	110	1.12245
Cell 18	Dendrite	1	2488	2332.1	1.06685			Cell 18	1	1	15.7	15.7	18	1.1465			Cell 18	30	0	0	0	0																				240	0	47.3	54	1.14165
									2	2	62	31	100	1.6129				60	0	0	0	0
									3	4	241.1	60.3	293	1.21526				90	3	104.4	160	1.53257		ID5
									4	8	551.8	69	662	1.19971				120	7	268.5	343	1.27747		Cell 21	Name	Qty	Spines	Length(µm)	Density				Order	Qty	Length total(µm)	mean	Spines	Density				Radius(µm)	Intersections	Length(µm)	Spines	Density
									5	8	515.8	64.5	606	1.17487				150	9	324.7	352	1.08408			Dendrite	1	705	772.3	0.912858			Cell 21	1	1	6.3	6.3	6	0.952381			Cell 21	30	5	57.7	40	0.693241
									6	8	638.9	79.9	799	1.25059				180	11	361.4	400	1.10681											2	2	23.4	11.7	16	0.683761				60	6	175	159	0.908571
									7	4	306.8	76.7	345	1.12451				210	14	453	583	1.28698											3	4	164.6	41.2	193	1.17254				90	8	235.8	216	0.916031
																		240	12	465.7	600	1.28838											4	6	286.2	47.7	203	0.709294				120	3	231.4	206	0.890233
																		270	4	284.7	325	1.14155											5	6	291.8	48.6	287	0.98355				150	1	58.9	71	1.20543
																		300	0	69.8	60	0.859599																				180	0	13.5	13	0.962963
																								Cell 22	Name	Qty	Spines	Length(µm)	Density				Order	Qty	Length total(µm)	mean	Spines	Density				Radius(µm)	Intersections	Length(µm)	Spines	Density
	Name	Qty	Spines	Length(µm)	Density				Order	Qty	Length total(µm)	mean	Spines	Density				Radius(µm)	Intersections	Length(µm)	Spines	Density			Dendrite	1	888	960.7	0.924326			Cell 23	1	1	16.7	16.7	14	0.838323			Cell 22	30	3	51.7	37	0.715667
Cell 19	Dendrite	1	1067	958.1	1.11366			Cell 19	1	1	79.2	79.2	102	1.28788			Cell 19	30	3	28.3	18	0.636042											2	2	85.4	42.7	78	0.913349				60	7	167.3	166	0.99223
									2	2	104.6	52.3	122	1.16635				60	7	181.5	209	1.15152											3	4	118.4	29.6	76	0.641892				90	10	258.5	272	1.05222
									3	2	65.4	32.7	70	1.07034				90	7	298.9	352	1.17765											4	4	120.5	30.1	115	0.954357				120	8	371	327	0.881402
									4	2	91.9	46	103	1.12078				120	5	229.9	242	1.05263											5	8	497.5	62.2	515	1.03518				150	0	112.2	86	0.766488
									5	2	32.1	16.1	17	0.529595				150	4	157.1	181	1.15213											6	2	122	61	90	0.737705
									6	4	217.3	54.3	258	1.1873				180	0	62.4	65	1.04167
									7	4	187.6	46.9	184	0.98081
									8	2	43.9	21.9	52	1.18451										Cell 23	Name	Qty	Spines	Length(µm)	Density				Order	Qty	Length total(µm)	mean	Spines					Radius(µm)	Intersections	Length(µm)	Spines	Density
									9	2	136.1	68	159	1.16826											Dendrite	1	1356	1434	0.945607			Cell 24	1	1	2.4	2.4	1	0.416667			Cell 23	30	0	0	0	0
																																	2	2	79.1	39.6	87	1.09987				60	5	116.5	86	0.738197
	Name	Qty	Spines	Length(µm)	Density				Order	Qty	Length total(µm)	mean	Spines	Density				Radius(µm)	Intersections	Length(µm)	Spines	Density											3	4	99.8	24.9	73	0.731463				90	8	225.2	226	1.00355
Cell 20	Dendrite	1	2599	2270.6	1.14463			Cell 20	1	1	10.6	10.6	8	0.754717			Cell 20	30	2	29.8	22	0.738255											4	8	287.2	35.9	251	0.873955				120	9	304.5	335	1.10016
									2	2	42.7	21.3	33	0.772834				60	4	109.9	85	0.77343											5	6	523.5	87.3	488	0.932187				150	11	377	317	0.840849
									3	4	145.6	36.4	180	1.23626				90	8	195.1	218	1.11738											6	6	442	73.7	456	1.03167				180	6	334.3	331	0.990129
									4	8	367.1	45.9	393	1.07055				120	14	325.8	388	1.19091																				210	0	76.6	61	0.796345
									5	16	1156.6	72.3	1393	1.20439				150	16	486.7	587	1.20608
									6	10	548.2	54.8	592	1.0799				180	17	529	605	1.14367
																		210	9	417.9	467	1.11749
																		240	2	145	190	1.31034
ID5																		270	0	31.4	37	1.17834		Cell 24	Name	Qty	Spines	Length(µm)	Density				Order	Qty	Length total(µm)	mean	Spines	Density				Radius(µm)	Intersections	Length(µm)	Spines	Density
																									Dendrite	1	589	804.1	0.732496			Cell 27	1	1	4.5	4.5	4	0.888889			Cell 24	30	4	60.4	37	0.612583
	Name	Qty	Spines	Length(µm)	Density				Order	Qty	Length total(µm)	mean	Spines	Density				Radius(µm)	Intersections	Length(µm)	Spines	Density											2	2	25.2	12.6	18	0.714286				60	9	246.9	197	0.797894
Cell 21	Dendrite	1	2934	2486.2	1.18011			Cell 21	1	1	109.4	109.4	171	1.56307			Cell 21	30	0	0	0	0											3	4	176.9	44.2	150	0.847937				90	9	301.6	227	0.752653
									2	2	92.3	46.1	91	0.985915				60	4	89.3	111	1.243											4	4	148.9	37.2	121	0.812626				120	2	183.7	119	0.647795
									3	2	138.3	69.2	269	1.94505				90	8	217	271	1.24885											5	6	400	66.7	262	0.655				150	0	11.5	9	0.782609
									4	2	199.3	99.6	183	0.918214				120	13	376.6	382	1.01434											6	2	48.5	24.3	34	0.701031
									5	2	127.3	63.7	150	1.17832				150	16	465.9	629	1.35008
									6	4	219.3	54.8	252	1.14911				180	16	567	712	1.25573
									7	2	45.2	22.6	40	0.884956				210	11	467	545	1.16702
									8	4	294.7	73.7	349	1.18426				240	3	193.7	195	1.00671
									9	6	283.1	47.2	328	1.1586				270	1	56.4	47	0.833333		Cell 25	Name	Qty	Spines	Length(µm)	Density				Order	Qty	Length total(µm)	mean	Spines	Density				Radius(µm)	Intersections	Length(µm)	Spines	Density
									10	10	579.3	57.9	681	1.17556				300	1	30.7	29	0.944625			Dendrite	1	934	1062.4	0.879142			Cell 31	1	1	0.9	0.9	1	1.11111			Cell 25	30	2	36.1	14	0.387812
									11	6	397.9	66.3	420	1.05554				330	0	22.5	13	0.577778											2	3	82.3	27.4	58	0.704739				60	5	116	88	0.758621
																																	3	4	199.4	49.8	124	0.621866				90	8	285.9	221	0.772998
																																	4	6	246.1	41	184	0.747664				120	8	264.3	262	0.991298
																																	5	4	211.9	53	244	1.15149				150	5	256.9	253	0.984819
	Name	Qty	Spines	Length(µm)	Density				Order	Qty	Length total(µm)	mean	Spines	Density				Radius(µm)	Intersections	Length(µm)	Spines	Density											6	4	321.8	80.4	323	1.00373				180	1	97.5	90	0.923077
Cell 22	Dendrite	1	2552	2178.3	1.17156			Cell 22	1	1	24.6	24.6	28	1.13821			Cell 22	30	0	0	0	0																				210	0	5.6	6	1.07143
									2	2	83.1	41.5	115	1.38387				60	0	0	0	0
									3	4	241.2	60.3	299	1.23964				90	2	25.2	28	1.11111

## Sheet: Bbs1_DG_P21
ID1	WT	Name	Qty	Spines	Length(µm)	Density				Order	Qty	Length total(µm)	MEAN	Spines	Density				Radius(µm)	Intersections	Length(µm)	Spines	Density			ID1	KO	Name	Qty	Spines	Length(µm)	Density				Order	Qty	Length total(µm)	MEAN	Spines	Density				Radius(µm)	Intersections	Length(µm)	Spines	Density
	Cell 1	Dendrite	3	1679	1562.9	1.07428			Cell 1	1	1	12.3	12.3	4	0.504202			Cell 1	30	4	5	6	1.17157				Cell 1	Dendrite	1	1274	2092.2	0.608928			Cell 1	1	5	65.7	13.1	29	0.4414			Cell 1	30	9	142	45	0.316901
										2	2	87.7	43.9	77	0.504202				60	7	345.1	285	1.17157													2	9	295.9	32.9	132	0.446097				60	13	492.4	276	0.56052
										3	2	51.5	25.7	35	0.504202				90	3	256.4	298	1.11427													3	18	1059.5	58.9	694	0.655026				90	13	647.6	399	0.616121
										4	4	152	38	154	0.504202				120	4	172.4	200	1.09118													4	10	452.3	45.2	290	0.641167				120	10	508.6	346	0.680299
										5	2	43.6	21.8	39	0.504202				150	3	136.2	167	1.14496													5	4	218.8	54.7	129	0.58958				150	4	263.1	186	0.706956
										6	4	390	97.5	451	0.504202				180	3	171.6	207	1.19284																						180	0	38.5	22	0.571429
										7	4	215.3	53.8	254	0.504202				210	6	256.7	269	1.00737
										8	2	105.9	52.9	122	0.504202				240	1	210.9	236	1.11901					Name	Qty	Spines	Length(µm)	Density				Order	Qty	Length total(µm)	mean	Spines	Density				Radius(µm)	Intersections	Length(µm)	Spines	Density
							`			9	4	269.8	67.4	277	0.504202				270	0	8.5	11	1.29412				Cell 2	Dendrite	1	1685	2691.1	0.626138			Cell 2	1	3	32.1	10.7	16	0.498442			Cell 2	30	6	113.3	50	0.441306
										10	2	82.8	41.4	128	0.504202																					2	6	118.8	19.8	44	0.37037				60	18	516.6	298	0.576849
										11	2	152	76	138	0.504202																					3	12	626.1	52.2	381	0.608529				90	21	848.4	555	0.654173
																																				4	18	1255.5	69.7	809	0.644365				120	13	781.4	488	0.62452
																																				5	8	435.2	54.4	291	0.668658				150	6	353	238	0.674221
		Name	Qty	Spines	Length(µm)	Density				Order	Qty	Length total(µm)	mean	Spines	Density				Radius(µm)	Intersections	Length(µm)	Spines	Density													6	4	223.4	55.8	144	0.644584				180	0	78.3	56	0.715198
	Cell 2	Dendrite	1	2605	1965.9	1.32509			Cell 2	1	3	48.2	16.1	35	0.726141			Cell 2	30	6	128.1	120	0.936768
										2	6	350.2	58.4	434	1.23929				60	15	381.5	445	1.16645
										3	8	501.7	62.7	642	1.27965				90	14	762.6	1039	1.36244
										4	8	659.7	82.5	925	0.683644				120	6	554.3	778	1.40357					Name	Qty	Spines	Length(µm)	Density				Order	Qty	Length total(µm)	mean	Spines	Density				Radius(µm)	Intersections	Length(µm)	Spines	Density
										5	4	242.5	60.6	351	1.44742				150	1	137.3	220	1.60233				Cell 3	Dendrite	3	1534	1363.4	1.12513			Cell 3	1	1	5.1	5.1	4	0.784314			Cell 3	30	5	50.1	59	1.17764
										6	2	163.6	81.8	218	1.33252				180	0	2	3	1.5													2	2	16.9	8.5	13	0.769231				60	5	186.8	150	0.802998
																																				3	4	279.1	69.8	307	1.09996				90	15	478.6	465	0.971584
																																				4	4	140.4	35.1	146	1.03989				120	8	385.6	520	1.34855
																																				5	6	309.2	51.5	365	1.18047				150	5	194.5	286	1.47044
																																				6	6	487.5	81.3	612	1.25538				180	0	67.9	54	0.795287
																																				7	2	125.2	62.6	87	0.694888
		Name	Qty	Spines	Length(µm)	Density				Order	Qty	Length total(µm)	mean	Spines	Density				Radius(µm)	Intersections	Length(µm)	Spines	Density
	Cell 3	Dendrite	3	2370	2103.8	1.12653			Cell 3	1	1	11.9	11.9	0	0			Cell 3	30	3	106.9	64	0.59869
										2	2	45.3	22.7	28	0.618102				60	9	465.6	434	0.932131					Name	Qty	Spines	Length(µm)	Density				Order	Qty	Length total(µm)	mean	Spines	Density				Radius(µm)	Intersections	Length(µm)	Spines	Density
										3	4	239.2	59.8	260	1.08696				90	4	304.7	354	1.1618				Cell 4	Dendrite	1	1996	1608.6	1.24083			Cell 4	1	3	35.2	11.7	23	0.653409			Cell 4	30	12	205.6	164	0.797665
										4	4	164.1	41	186	1.13346				120	7	377.8	422	1.11699													2	6	205.4	34.2	243	1.18306				60	14	509.9	613	1.2022
										5	4	307.4	76.9	256	0.832791				150	11	361.8	452	1.24931													3	10	509.6	51	621	1.2186				90	9	529.6	749	1.41427
										6	2	154.8	77.4	173	1.11757				180	3	318	393	1.23585													4	8	564.1	70.5	726	1.28701				120	3	310.9	402	1.29302
										7	4	422.8	105.7	498	1.17786				210	2	128.2	178	1.38846													5	4	212.8	53.2	278	1.30639				150	0	52.6	68	1.29278
										8	2	187.7	93.9	260	1.38519				240	0	40.8	73	1.78922													6	2	81.5	40.7	105	1.28834
										9	4	287	71.7	327	1.13937
										10	4	217.4	54.4	273	1.25575
										11	2	66.2	33.1	109	1.64653													Name	Qty	Spines	Length(µm)	Density				Order	Qty	Length total(µm)	mean	Spines	Density				Radius(µm)	Intersections	Length(µm)	Spines	Density
																											Cell 5	Dendrite	2	1709	1436.2	1.18995			Cell 5	1	2	7.3	3.6	5	0.684932			Cell 5	30	6	145.6	170	1.16758
																																				2	4	167.1	41.8	191	1.14303				60	8	343.9	458	1.33178
																																				3	6	353.4	58.9	466	1.31862				90	8	361.6	430	1.18916
		Name	Qty	Spines	Length(µm)	Density				Order	Qty	Length total(µm)	mean	Spines	Density				Radius(µm)	Intersections	Length(µm)	Spines	Density													4	8	509.6	63.7	620	1.21664				120	5	277	277	1
	Cell 4	Dendrite	1	3322	2345.4	1.41639			Cell 4	1	4	55.8	14	42	0.752688			Cell 4	30	9	186.7	155	0.830209													5	4	252.1	63	301	1.19397				150	4	185.1	212	1.14533
										2	8	303.5	37.9	374	1.23229				60	18	677.1	907	1.33954													6	2	146.7	73.4	126	0.858896				180	1	99	162	1.63636
										3	12	688.8	57.4	986	1.43148				90	12	696.6	1113	1.59776
										4	12	765.4	63.8	1177	1.53776				120	10	534.9	764	1.4283
										5	8	308.5	38.6	448	1.45219				150	3	220.4	338	1.53358			ID2		Name	Qty	Spines	Length(µm)	Density				Order	Qty	Length total(µm)	mean	Spines	Density				Radius(µm)	Intersections	Length(µm)	Spines	Density
										6	4	223.4	55.8	295	1.3205				180	0	29.9	45	1.50502				Cell 6	Dendrite	1	2093	1937.3	1.08037			Cell 6	1	5	89.8	18	55	0.612472			Cell 6	30	10	238.4	155	0.650168
																																				2	10	610.7	61.1	687	1.12494				60	16	629.7	644	1.02271
																																				3	10	659.5	66	739	1.12055				90	12	645.4	771	1.19461
		Name	Qty	Spines	Length(µm)	Density				Order	Qty	Length total(µm)	mean	Spines	Density				Radius(µm)	Intersections	Length(µm)	Spines	Density													4	4	446.4	111.6	446	0.999104				120	4	361.8	435	1.20232
	Cell 5	Dendrite	1	2169	2404.8	0.901946			Cell 5	1	2	9.4	4.7	5	0.5			Cell 5	30	9	127.6	73	0.5721													5	2	130.9	65.5	166	1.26814				150	0	62	88	1.41935
										2	4	52.6	13.2	23	0.250951				60	20	689.6	493	0.714907
										3	8	487.8	61	415	0.125051				90	20	898.1	834	0.928627
										4	10	665.3	66.5	591	0.0999549				120	6	581.7	640	1.10022					Name	Qty	Spines	Length(µm)	Density				Order	Qty	Length total(µm)	mean	Spines	Density				Radius(µm)	Intersections	Length(µm)	Spines	Density
										5	12	709	59.1	672	0.0833568				150	1	100.1	118	1.17882				Cell 7	Dendrite	2	1414	1212.8	1.1659			Cell 7	1	1	22.7	22.7	5	0.220264			Cell 7	30	1	17.2	3	0.174419
										6	6	354.9	59.1	375	0.166526				180	0	7.6	11	1.44737													2	2	83.2	41.6	62	0.745192				60	3	217.3	185	0.851358
										7	2	125.8	62.9	88	0.5																					3	4	165.6	41.4	166	1.00242				90	7	243.1	244	1.0037
																																				4	6	291.5	48.6	276	0.946827				120	7	266.4	319	1.19745
ID2																																				5	2	148.3	74.1	212	1.42953				150	5	222.2	290	1.30513
																																				6	2	162.1	81	256	1.57927				180	2	152	232	1.52632
		Name	Qty	Spines	Length(µm)	Density				Order	Qty	Length total(µm)	mean	Spines	Density				Radius(µm)	Intersections	Length(µm)	Spines	Density													7	2	114.2	57.1	127	1.11208				210	1	60	89	1.48333
	Cell 6	Dendrite	1	3322	2345.4	1.41639			Cell 6	1	4	55.8	14	42	0.752688			Cell 6	30	9	186.7	155	0.830209													8	2	225.2	112.6	310	1.37655				240	0	34.6	52	1.50289
										2	8	303.5	37.9	374	1.23229				60	18	677.1	907	1.33954
										3	12	688.8	57.4	986	1.43148				90	12	696.6	1113	1.59776
										4	12	765.4	63.8	1177	1.53776				120	10	534.9	764	1.4283					Name	Qty	Spines	Length(µm)	Density				Order	Qty	Length total(µm)	mean	Spines	Density				Radius(µm)	Intersections	Length(µm)	Spines	Density
										5	8	308.5	38.6	448	1.45219				150	3	220.4	338	1.53358				Cell 8	Dendrite	4	1717	1401.2	1.22538			Cell 8	1	1	8.8	8.8	0	0			Cell 8	30	2	46.7	43	0.920771
										6	4	223.4	55.8	295	1.3205				180	0	29.9	45	1.50502													2	2	110.6	55.3	187	1.69078				60	4	149.8	180	1.2016
																																				3	2	99.8	49.9	132	1.32265				90	5	182.4	234	1.28289
																																				4	4	421	105.2	603	1.4323				120	6	390.1	416	1.06639
		Name	Qty	Spines	Length(µm)	Density				Order	Qty	Length total(µm)	mean	Spines	Density				Radius(µm)	Intersections	Length(µm)	Spines	Density													5	4	258.2	64.6	230	0.890782				150	3	180.8	256	1.41593
	Cell 7	Dendrite	4	2008	1731.9	1.15942			Cell 7	1	1	22	22	10	0.454545			Cell 7	30	4	70.7	65	0.919378													6	2	121.4	60.7	123	1.01318				180	3	119.9	153	1.27606
										2	2	128	64	114	0.890625				60	5	221.5	260	1.17381													7	2	110.6	55.3	102	0.922242				210	3	129.7	148	1.14109
										3	4	190.4	47.6	208	1.09244				90	11	504.2	597	1.18405													8	2	186	93	221	1.18817				240	2	127.6	176	1.37931
										4	4	268.7	67.2	408	1.51842				120	3	231.4	273	1.17978													9	2	84.8	42.4	119	1.4033				270	0	74	111	1.5
										5	4	164.4	41.1	173	1.05231				150	2	132	148	1.12121
										6	6	340.8	56.8	394	1.1561				180	4	184.1	197	1.07007					Name	Qty	Spines	Length(µm)	Density				Order	Qty	Length total(µm)	mean	Spines	Density				Radius(µm)	Intersections	Length(µm)	Spines	Density
										7	6	285.7	47.6	307	1.07455				210	4	171	194	1.1345				Cell 9	Dendrite	3	1484	1263	1.17498			Cell 9	1	1	38.7	38.7	15	1			Cell 9	30	4	50.1	23	0.459082
										8	4	244.8	61.2	277	1.13154				240	1	206.2	254	1.23181													2	2	49.5	24.7	44	0.49899				60	5	293.9	298	1.01395
										9	2	87.1	43.5	117	1.34328				270	0	10.6	20	1.88679													3	4	186.8	46.7	202	0.25				90	5	270.3	335	1.23936
																																				4	4	367.9	92	438	0.250068				120	5	206.2	269	1.30456
																																				5	4	246.3	61.6	331	0.250102				150	5	211	281	1.33175
		Name	Qty	Spines	Length(µm)	Density				Order	Qty	Length total(µm)	mean	Spines	Density				Radius(µm)	Intersections	Length(µm)	Spines	Density													6	2	78.4	39.2	103	0.5				180	1	205.3	237	1.15441
	Cell 8	Dendrite	1	2573	2037.4	1.26288			Cell 8	1	4	74.1	18.5	74	0.99865			Cell 8	30	7	141.1	139	0.985117													7	4	259.8	64.9	312	0.249808				210	0	26.3	41	1.55894
										2	8	267.1	33.4	314	1.17559				60	21	711.4	856	1.20326													8	2	35.6	17.8	39	0.5
										3	10	602.5	60.2	686	1.13859				90	13	709.3	940	1.32525
										4	9	652.3	72.5	884	1.3552				120	3	401.1	548	1.36624
										5	4	225.9	56.5	348	1.5405				150	0	74.4	90	1.20968					Name	Qty	Spines	Length(µm)	Density				Order	Qty	Length total(µm)	mean	Spines	Density				Radius(µm)	Intersections	Length(µm)	Spines	Density
										6	2	215.5	107.7	267	1.23898												Cell 10	Dendrite	1	1799	1670	1.07725			Cell 10	1	3	39.8	13.3	23	0.577889			Cell 10	30	10	212.8	131	0.615602
																																				2	6	243	40.5	279	1.14815				60	14	556.5	510	0.916442
																																				3	8	410.8	51.3	380	0.925024				90	7	591.6	753	1.27282
		Name	Qty	Spines	Length(µm)	Density				Order	Qty	Length total(µm)	mean	Spines	Density				Radius(µm)	Intersections	Length(µm)	Spines	Density													4	8	514.6	64.3	613	1.19122				120	3	218.4	284	1.30037
	Cell 9	Dendrite	1	2738	2096.4	1.30605			Cell 9	1	1	15.2	15.2	7	0.460526			Cell 9	30	2	87.5	84	0.96													5	4	278.9	69.7	314	1.12585				150	1	83.8	111	1.32458
										2	2	33.7	16.9	29	0.860534				60	10	230.7	297	1.28739													6	2	182.9	91.5	190	1.03882				180	0	7	10	1.42857
										3	4	96	24	115	1.19792				90	6	325.4	452	1.38906
										4	6	311.3	51.9	451	1.44876				120	5	354.9	517	1.45675			ID3
										5	6	239.6	39.9	344	1.43573				150	10	380.3	469	1.23324					Name	Qty	Spines	Length(µm)	Density				Order	Qty	Length total(µm)	mean	Spines	Density				Radius(µm)	Intersections	Length(µm)	Spines	Density
										6	6	258.1	43	349	1.35219				180	9	513.7	655	1.27506				Cell 11	Dendrite	2	1867	1833.1	1.01849			Cell 11	1	1	18.6	18.6	10	0.537634			Cell 11	30	2	45.1	27	0.59867
										7	6	306.2	51	406	1.32593				210	1	173	221	1.27746													2	2	77.2	38.6	59	0.764249				60	6	228.3	207	0.906702
										8	4	189.8	47.4	261	1.37513				240	0	30.9	43	1.39159													3	4	168.1	42	161	0.957763				90	8	403.7	415	1.02799
										9	4	273.8	68.5	326	1.19065																					4	6	262.2	43.7	278	1.06026				120	6	373	385	1.03217
										10	6	372.7	62.1	450	1.20741																					5	8	447.4	55.9	439	0.981225				150	4	225.4	245	1.08696
																																				6	4	204.2	51.1	229	1.12145				180	3	154.3	173	1.12119
																																				7	4	186.2	46.5	212	1.13856				210	1	293	286	0.976109
		Name	Qty	Spines	Length(µm)	Density				Order	Qty	Length total(µm)	mean	Spines	Density				Radius(µm)	Intersections	Length(µm)	Spines	Density													8	6	254.5	42.4	306	1.20236				240	0	110.2	129	1.1706
	Cell 10	Dendrite	2	1851	1519.8	1.21792			Cell 10	1	2	3.2	1.6	5	1.5625			Cell 10	30	8	161	177	1.09938													9	4	214.7	53.7	173	0.805776
										2	4	161.8	40.4	169	1.0445				60	14	529.5	638	1.20491
										3	6	399	66.5	545	1.36591				90	8	554.4	677	1.22114
										4	6	421.9	70.3	467	1.1069				120	1	253.6	329	1.29732					Name	Qty	Spines	Length(µm)	Density				Order	Qty	Length total(µm)	mean	Spines	Density				Radius(µm)	Intersections	Length(µm)	Spines	Density
										5	6	297.8	49.6	392	1.31632				150	0	21.3	30	1.40845				Cell 12	Dendrite	1	2063	1726.7	1.19476			Cell 12	1	2	18.2	9.1	4	0.21978			Cell 12	30	8	190.2	144	0.757098
										6	2	113.6	56.8	148	1.30282																					2	4	103.9	26	86	0.827719				60	12	483.3	582	1.20422
										7	2	122.5	61.3	125	1.02041																					3	8	653.1	81.6	780	1.1943				90	9	539.5	709	1.31418
ID3																																				4	6	404.1	67.4	469	1.1606				120	5	336.3	376	1.11805
																																				5	6	297.8	49.6	367	1.23237				150	2	157.6	232	1.47208
		Name	Qty	Spines	Length(µm)	Density				Order	Qty	Length total(µm)	mean	Spines	Density				Radius(µm)	Intersections	Length(µm)	Spines	Density													6	2	158.7	79.4	219	1.37996				180	0	19.7	20	1.01523
	Cell 11	Dendrite	1	2370	2103.8	1.12653			Cell 11	1	1	11.9	11.9	0	0			Cell 11	30	3	106.9	64	0.59869													7	2	90.9	45.4	138	1.51815
										2	2	45.3	22.7	28	0.618102				60	9	465.6	434	0.932131
										3	4	239.2	59.8	260	1.08696				90	4	304.7	354	1.1618
										4	4	164.1	41	186	1.13346				120	7	377.8	422	1.11699					Name	Qty	Spines	Length(µm)	Density				Order	Qty	Length total(µm)	mean	Spines	Density				Radius(µm)	Intersections	Length(µm)	Spines	Density
										5	4	307.4	76.9	256	0.832791				150	11	361.8	452	1.24931				Cell 13	Dendrite	2	1631	1377.9	1.18369			Cell 13	1	1	57	57	55	0.964912			Cell 13	30	1	5.1	2	0.392157
										6	2	154.8	77.4	173	1.11757				180	3	318	393	1.23585													2	2	68.9	34.5	79	1.14659				60	2	86.6	86	0.993072
										7	4	422.8	105.7	498	1.17786				210	2	128.2	178	1.38846													3	4	204.6	51.1	265	1.29521				90	5	244.8	302	1.23366
										8	2	187.7	93.9	260	1.38519				240	0	40.8	73	1.78922													4	2	183.7	91.8	212	1.15406				120	3	205.9	258	1.25304
										9	4	287	71.7	327	1.13937																					5	2	55.5	27.8	71	1.27928				150	3	211	222	1.05213
										10	4	217.4	54.4	273	1.25575																					6	2	119.1	59.5	132	1.10831				180	4	170.8	208	1.2178
										11	2	66.2	33.1	109	1.64653																					7	2	87.9	44	118	1.34243				210	1	226.2	283	1.25111
																																				8	4	124.9	31.2	123	0.984788				240	1	205.2	239	1.16472
																																				9	6	312	52	411	1.31731				270	0	22.3	31	1.39013
		Name	Qty	Spines	Length(µm)	Density				Order	Qty	Length total(µm)	mean	Spines	Density				Radius(µm)	Intersections	Length(µm)	Spines	Density													10	4	164.3	41.1	165	1.00426
	Cell 12	Dendrite	3	1996	1608.6	1.24083			Cell 12	1	3	35.2	11.7	23	0.653409			Cell 12	30	12	205.6	164	0.797665
										2	6	205.4	34.2	243	1.18306				60	14	509.9	613	1.2022
										3	10	509.6	51	621	1.2186				90	9	529.6	749	1.41427					Name	Qty	Spines	Length(µm)	Density				Order	Qty	Length total(µm)	mean	Spines	Density				Radius(µm)	Intersections	Length(µm)	Spines	Density
										4	8	564.1	70.5	726	1.28701				120	3	310.9	402	1.29302				Cell 14	Dendrite	1	2248	1837.7	1.22327			Cell 14	1	2	21	10.5	15	0.714286			Cell 14	30	6	184.4	137	0.74295
										5	4	212.8	53.2	278	1.30639				150	0	52.6	68	1.29278													2	4	85	21.2	58	0.682353				60	13	459.6	477	1.03786
										6	2	81.5	40.7	105	1.28834																					3	8	597.4	74.7	691	1.15668				90	15	600.7	798	1.32845
																																				4	6	389.6	64.9	554	1.42197				120	7	454.1	660	1.45342
																																				5	6	482.4	80.4	627	1.29975				150	0	138.8	176	1.26801
		Name	Qty	Spines	Length(µm)	Density				Order	Qty	Length total(µm)	mean	Spines	Density				Radius(µm)	Intersections	Length(µm)	Spines	Density													6	4	262.3	65.6	303	1.15517
	Cell 13	Dendrite	1	2835	2291.6	1.23713			Cell 13	1	1	8.9	8.9	0	0			Cell 13	30	2	49.1	31	0.631365
										2	2	71.8	35.9	61	0.849582				60	6	183.4	184	1.00327
										3	4	132.8	33.2	119	0.896084				90	10	424.8	466	1.09699					Name	Qty	Spines	Length(µm)	Density				Order	Qty	Length total(µm)	mean	Spines	Density				Radius(µm)	Intersections	Length(µm)	Spines	Density
										4	8	505.1	63.1	555	1.09879				120	15	619.6	784	1.26533				Cell 15	Dendrite	1	1450	1548.2	0.936572			Cell 15	1	3	49.3	16.4	35	0.709939			Cell 15	30	10	219.4	128	0.583409
										5	12	972.9	81.1	1275	1.31051				150	8	585.6	820	1.40027													2	6	296.9	49.5	277	0.932974				60	17	589.4	422	0.715982
										6	4	212.9	53.2	286	1.34335				180	4	263.6	355	1.34674													3	6	351.7	58.6	345	0.98095				90	9	545.3	745	1.36622
										7	4	126.1	31.5	166	1.31642				210	2	139.8	163	1.16595													4	6	316.4	52.7	378	1.19469				120	2	164.5	134	0.81459
										8	2	261	130.5	373	1.42912				240	0	25.5	32	1.2549													5	4	309.7	77.4	236	0.762028				150	0	29.5	21	0.711864
																																				6	2	121.6	60.8	115	0.945724
																																				7	2	102.6	51.3	64	0.623782
		Name	Qty	Spines	Length(µm)	Density				Order	Qty	Length total(µm)	mean	Spines	Density				Radius(µm)	Intersections	Length(µm)	Spines	Density
	Cell 14	Dendrite	5	1228	1234.8	0.994493			Cell 14	1	1	34	34	15	0.441176			Cell 14	30	3	54.7	25	0.457038
										2	2	33.9	17	19	0.560472				60	5	201.5	162	0.80397
										3	4	313.5	78.4	293	0.934609				90	8	319.3	352	1.10241
										4	4	263.4	65.9	255	0.968109				120	5	311.9	310	0.993908
										5	6	590	98.3	646	1.09492				150	3	201.3	213	1.05812
																			180	2	94.8	101	1.0654
																			210	0	51.3	65	1.26706
		Name	Qty	Spines	Length(µm)	Density				Order	Qty	Length total(µm)	mean	Spines	Density				Radius(µm)	Intersections	Length(µm)	Spines	Density
	Cell 15	Dendrite	4	1717	1401.2	1.22538			Cell 15	1	1	8.8	8.8	0	0			Cell 15	30	2	46.7	43	0.920771
										2	2	110.6	55.3	187	1.69078				60	4	149.8	180	1.2016
										3	2	99.8	49.9	132	1.32265				90	5	182.4	234	1.28289
										4	4	421	105.2	603	1.4323				120	6	390.1	416	1.06639
										5	4	258.2	64.6	230	0.890782				150	3	180.8	256	1.41593
										6	2	121.4	60.7	123	1.01318				180	3	119.9	153	1.27606
										7	2	110.6	55.3	102	0.922242				210	3	129.7	148	1.14109
										8	2	186	93	221	1.18817				240	2	127.6	176	1.37931
										9	2	84.8	42.4	119	1.4033				270	0	74	111	1.5

## Sheet: Bbs4_DG_P42_spine subtypes
WT	Name	Qty	Spines	Thin	Stubby	Mushroom	Filopodia	Branched	Length(µm)	Overall mean			Cell 1	Order	Qty	Length total(µm)	MEAN	Spines	Thin	Stubby	Mushroom	Filopodia	Branched			Cell 1	Radius(µm)	Intersections	Length(µm)	Spines	Thin	Stubby	Mushroom	Filopodia	Branched			KO	Name	Qty	Spines	Thin	Stubby	Mushroom	Filopodia	Branched	Length(µm)	Overall mean
ID1														1	1	13.7	13.7	10	3	3	0	2	2				30	2	29.8	22	0	5	5	7	5			ID1
Cell 1	Dendrite	1	2934	898	733	461	656	186	2415.9	1.21445				2	2	30.4	15.2	49	11	11	12	11	4				60	4	109.9	85	23	16	20	14	12			Cell 1	Dendrite	1	611	172	143	140	94	62	771.9	0.791553
														3	4	217.4	54.4	271	55	88	54	49	25				90	8	195.1	218	70	33	33	31	38
														4	8	526.7	65.8	648	189	187	109	129	34				120	14	325.8	388	127	80	63	52	24
														5	8	465.3	58.2	487	163	110	53	102	59				150	16	486.7	587	134	105	79	42	75
														6	8	533.1	66.6	705	249	141	105	185	25				180	17	529	605	126	129	81	63	55
														7	6	415.5	69.3	487	148	114	63	130	32				210	9	417.9	467	86	103	60	67	63
														8	4	213.9	53.5	277	80	79	65	48	5				240	2	145	190	26	58	33	40	28
																											270	0	31.4	37	6	9	9	2	11
																																							Name	Qty	Spines	Thin	Stubby	Mushroom	Filopodia	Branched	Length(µm)	Overall mean
																																						Cell 2	Dendrite	1	637	207	167	140	76	47	887	0.718151
	Name	Qty	Spines	Thin	Stubby	Mushroom	Filopodia	Branched	Length(µm)	Overall mean			Cell 2	Order	Qty	Length total(µm)	MEAN	Spines	Thin	Stubby	Mushroom	Filopodia	Branched			Cell 2	Radius(µm)	Intersections	Length(µm)	Spines	Thin	Stubby	Mushroom	Filopodia	Branched
Cell 2	Dendrite	1	2521	779	620	408	522	192	1917.8	1.31453				1	1	66.5	66.5	76	25	34	10	5	2				30	2	27.3	30	9	9	2	4	6
														2	2	147	73.5	191	55	47	18	60	11				60	6	150.5	225	50	42	48	56	29
														3	2	69.5	34.7	80	14	30	14	17	5				90	8	236.6	344	71	84	39	109	41
														4	4	176.3	44.1	190	75	54	20	34	7				120	14	334.4	440	131	124	55	108	22
														5	6	329.1	54.9	350	100	67	67	56	60				150	13	446.3	564	206	127	83	126	22
														6	8	499.9	62.5	487	153	121	57	97	59				180	9	430.1	573	200	155	105	65	48
														7	8	398.7	49.8	401	135	46	89	108	23				210	4	195.8	233	83	53	41	32	24
														8	4	295	73.8	359	119	111	69	50	10				240	1	94.4	111	29	25	35	22	0
														9	2	126.1	63.1	137	52	35	4	13	33				270	0	2.4	1	0	1	0	0	0
																																							Name	Qty	Spines	Thin	Stubby	Mushroom	Filopodia	Branched	Length(µm)	Overall mean
																																						Cell 3	Dendrite	1	900	215	240	184	163	98	835.2	1.07759
	Name	Qty	Spines	Thin	Stubby	Mushroom	Filopodia	Branched	Length(µm)	Overall mean			Cell 3	Order	Qty	Length total(µm)	MEAN	Spines	Thin	Stubby	Mushroom	Filopodia	Branched			Cell 3	Radius(µm)	Intersections	Length(µm)	Spines	Thin	Stubby	Mushroom	Filopodia	Branched
Cell 3	Dendrite	1	2271	728	545	348	440	210	2108.1	1.07727				1	1	66.5	66.5	76	25	34	10	5	2				30	3	36.1	48	14	11	8	9	6
														2	2	147	73.5	191	55	47	18	60	11				60	4	115	127	38	42	17	17	13
														3	2	69.5	34.7	80	14	30	14	17	5				90	8	191.7	202	51	56	40	37	18
														4	4	176.3	44.1	190	75	54	20	34	7				120	9	271	283	99	63	41	58	22
														5	6	329.1	54.9	350	100	67	67	56	60				150	14	384.7	488	148	111	54	115	60
														6	8	499.9	62.5	487	153	121	57	97	59				180	13	471.5	514	190	135	81	79	29
														7	8	398.7	49.8	401	135	46	89	108	23				210	10	420.2	421	139	91	84	86	21				Name	Qty	Spines	Thin	Stubby	Mushroom	Filopodia	Branched	Length(µm)	Overall mean
														8	4	295	73.8	359	119	111	69	50	10				240	2	190.2	162	46	28	21	35	32			Cell 4	Dendrite	1	587	138	152	94	44	25	705.5	0.832034
														9	2	126.1	63.1	137	52	35	4	13	33				270	0	27.7	26	3	8	2	4	9
	Name	Qty	Spines	Thin	Stubby	Mushroom	Filopodia	Branched	Length(µm)	Overall mean			Cell 4	Order	Qty	Length total(µm)	MEAN	Spines	Thin	Stubby	Mushroom	Filopodia	Branched			Cell 4	Radius(µm)	Intersections	Length(µm)	Spines	Thin	Stubby	Mushroom	Filopodia	Branched
Cell 4	Dendrite	1	1519	463	340	291	275	149	1547.4	0.981647				1	1	12.3	12.3	14	4	6	0	1	3				30	2	36.2	48	11	17	0	7	13
														2	2	52.7	26.4	62	7	22	1	11	21				60	4	103.4	125	30	36	24	16	18
														3	4	171.1	42.8	221	58	68	37	39	18				90	8	202	258	60	67	35	53	43
														4	8	447.3	55.9	447	133	91	110	70	43				120	12	316.5	331	83	85	84	47	32				Name	Qty	Spines	Thin	Stubby	Mushroom	Filopodia	Branched	Length(µm)	Overall mean
														5	8	484.6	60.6	436	143	83	81	83	46				150	13	453.8	413	158	64	94	74	23			Cell 5	Dendrite	1	720	176	187	187	81	89	885.9	0.812733
														6	6	271.2	45.2	243	87	44	51	44	17				180	5	274.3	219	71	40	37	58	13
														7	2	108.1	54	96	31	26	11	27	1				210	3	123.8	96	40	20	13	18	5
																											240	0	37.3	29	10	11	4	2	2
	Name	Qty	Spines	Thin	Stubby	Mushroom	Filopodia	Branched	Length(µm)	Overall mean			Cell 5	Order	Qty	Length total(µm)	MEAN	Spines	Thin	Stubby	Mushroom	Filopodia	Branched			Cell 5	Radius(µm)	Intersections	Length(µm)	Spines	Thin	Stubby	Mushroom	Filopodia	Branched			ID2
Cell 5	Dendrite	1	1756	591	436	251	241	237	1632.6	1.07558				1	1	20.7	20.7	21	7	8	4	2	0				30	2	23	24	9	9	4	2	0
														2	2	97.7	48.9	103	36	45	2	6	14				60	2	72.1	77	30	34	1	6	6				Name	Qty	Spines	Thin	Stubby	Mushroom	Filopodia	Branched	Length(µm)	Overall mean
														3	4	172.6	43.1	222	61	55	38	39	29				90	5	128.8	158	44	50	27	13	24			Cell 6	Dendrite	1	806	183	144	200	174	105	894.9	0.900659
														4	8	498.1	62.3	604	201	147	120	69	67				120	8	208.8	285	78	54	54	45	54
														5	10	686.8	68.7	685	241	167	82	99	96				150	9	271.5	320	111	97	35	45	32
														6	4	156.7	39.2	121	45	14	5	26	31				180	12	346	360	122	90	56	45	47
																											210	7	371.1	346	118	75	37	56	60
																											240	3	161.3	144	60	26	23	27	8
																											270	0	50	42	19	1	14	2	6
ID2
																																							Name	Qty	Spines	Thin	Stubby	Mushroom	Filopodia	Branched	Length(µm)	Overall mean
	Name	Qty	Spines	Thin	Stubby	Mushroom	Filopodia	Branched	Length(µm)	Overall mean			Cell 6	Order	Qty	Length total(µm)	MEAN	Spines	Thin	Stubby	Mushroom	Filopodia	Branched			Cell 6	Radius(µm)	Intersections	Length(µm)	Spines	Thin	Stubby	Mushroom	Filopodia	Branched			Cell 7	Dendrite	1	667	214	131	155	97	70	803	0.830635
Cell 6	Dendrite	1	1335	460	317	219	213	126	1263	1.05701				1	1	27.2	27.2	20	4	10	3	1	2				30	1	17.5	14	3	7	3	1	0
														2	2	76.7	38.3	65	20	23	8	5	9				60	3	79.1	68	20	20	7	8	13
														3	4	269.6	67.4	240	90	55	39	34	22				90	5	127.6	148	43	41	36	13	15
														4	6	332.3	55.4	375	105	84	70	79	37				120	7	192.2	222	76	46	30	40	30
														5	6	316.3	52.7	343	122	58	63	77	23				150	8	232.2	271	88	78	26	54	25
														6	2	114.8	57.4	155	67	52	32	4	0				180	7	274.5	290	115	65	60	40	10
														7	2	126.1	63.1	137	52	35	4	13	33				210	7	230.5	224	88	42	48	40	6
																											240	2	98.6	88	26	14	8	14	26
																											270	0	10.7	10	1	4	1	3	1
																																							Name	Qty	Spines	Thin	Stubby	Mushroom	Filopodia	Branched	Length(µm)	Overall mean
																																						Cell 8	Dendrite	1	959	281	233	226	141	78	911.6	1.052
	Name	Qty	Spines	Thin	Stubby	Mushroom	Filopodia	Branched	Length(µm)	Overall mean			Cell 7	Order	Qty	Length total(µm)	MEAN	Spines	Thin	Stubby	Mushroom	Filopodia	Branched			Cell 7	Radius(µm)	Intersections	Length(µm)	Spines	Thin	Stubby	Mushroom	Filopodia	Branched
Cell 7	Dendrite	1	2101	654	487	332	389	238	1807.1	1.16264				1	1	9	9	3	1	1	1	0	0				30	0	0	0	0	0	0	0	0
														2	2	32.9	16.4	43	11	18	4	2	8				60	5	40.1	40	11	14	8	1	6
														3	4	191.6	47.9	226	56	89	36	22	22				90	5	240.4	299	78	109	36	33	42
														4	8	495.3	61.9	603	159	139	109	110	86				120	11	368	498	144	125	86	72	71				Name	Qty	Spines	Thin	Stubby	Mushroom	Filopodia	Branched	Length(µm)	Overall mean
														5	14	763.9	54.6	841	294	182	125	171	69				150	9	451.7	536	174	128	90	92	52			Cell 9	Dendrite	1	985	234	232	253	149	117	913.9	1.0778
														6	4	223.7	55.9	267	97	49	37	44	40				180	11	396.4	407	126	75	61	92	53
														7	2	90.7	45.4	118	36	9	20	40	13				210	4	240.8	250	92	23	44	77	14
																											240	0	69.7	71	29	13	7	22	0
	Name	Qty	Spines	Thin	Stubby	Mushroom	Filopodia	Branched	Length(µm)	Overall mean			Cell 8	Order	Qty	Length total(µm)	MEAN	Spines	Thin	Stubby	Mushroom	Filopodia	Branched			Cell 8	Radius(µm)	Intersections	Length(µm)	Spines	Thin	Stubby	Mushroom	Filopodia	Branched
Cell 8	Dendrite	1	2336	660	607	417	478	173	2112	1.10606				1	1	9.5	9.5	11	3	5	0	0	3				30	2	15.6	20	6	8	0	0	6				Name	Qty	Spines	Thin	Stubby	Mushroom	Filopodia	Branched	Length(µm)	Overall mean
														2	2	64.3	32.2	77	12	23	1	14	27				60	3	95.4	115	16	41	19	14	24			Cell 10	Dendrite	1	1030	295	247	186	179	123	1013.9	1.01588
														3	4	119.8	29.9	159	38	49	50	19	2				90	7	198.4	261	81	71	54	42	13
														4	8	523.6	65.4	608	144	170	91	163	40				120	8	288.9	350	91	88	44	117	10
														5	10	879.2	87.9	918	281	225	177	188	47				150	10	272.5	289	66	89	55	69	10
														6	6	434.4	72.4	500	161	135	98	69	37				180	12	396	464	137	110	93	103	21
														7	2	81.3	40.6	63	21	0	0	25	17				210	10	365.7	390	118	99	82	46	45
																											240	6	231.2	241	87	53	44	41	16			ID3
																											270	4	186.3	165	41	43	23	36	22
																											300	0	62	41	17	5	3	10	6				Name	Qty	Spines	Thin	Stubby	Mushroom	Filopodia	Branched	Length(µm)	Overall mean
																																						Cell 11	Dendrite	1	2280	618	597	456	398	211	1968.5	1.15824
	Name	Qty	Spines	Thin	Stubby	Mushroom	Filopodia	Branched	Length(µm)	Overall mean			Cell 9	Order	Qty	Length total(µm)	MEAN	Spines	Thin	Stubby	Mushroom	Filopodia	Branched			Cell 9	Radius(µm)	Intersections	Length(µm)	Spines	Thin	Stubby	Mushroom	Filopodia	Branched
Cell 9	Dendrite	1	2156	471	425	342	194	184	2050.4	1.0515				1	1	28.8	28.8	36	7	13	2	0	14				30	0	0	0	0	0	0	0	0
														2	2	107.1	53.6	101	37	16	29	8	11				60	1	13.4	19	3	6	1	0	9
														3	4	285	71.3	276	67	40	45	40	19				90	2	83.6	75	27	15	17	4	12
														4	8	818.5	102.3	816	151	140	133	72	37				120	4	115	113	33	17	27	8	14
														5	10	695.5	69.5	816	183	178	120	53	90				150	6	189.7	217	63	53	49	34	11
														6	2	115.6	57.8	111	26	38	13	21	13				180	7	248.2	242	67	54	71	31	6
																											210	10	287.1	287	35	42	21	24	29
																											240	12	432.8	420	80	51	51	19	24
																											270	9	411	413	78	69	43	41	42
																											300	3	223.4	277	73	79	31	33	26				Name	Qty	Spines	Thin	Stubby	Mushroom	Filopodia	Branched	Length(µm)	Overall mean
																											330	1	35.4	71	8	29	23	0	11			Cell 12	Dendrite	1	674	234	168	95	144	33	835.2	0.806992
																											360	0	10.9	22	4	10	8	0	0
	Name	Qty	Spines	Thin	Stubby	Mushroom	Filopodia	Branched	Length(µm)	Overall mean			Cell 10	Order	Qty	Length total(µm)	MEAN	Spines	Thin	Stubby	Mushroom	Filopodia	Branched			Cell 10	Radius(µm)	Intersections	Length(µm)	Spines	Thin	Stubby	Mushroom	Filopodia	Branched
Cell 10	Dendrite	1	4933	1533	1365	1123	706	206	2523.9	1.95451				1	1	6.3	6.3	16	1	4	4	3	4				30	2	23.6	38	10	11	10	3	4
														2	2	55.3	27.6	117	46	43	28	0	0				60	6	112.8	217	83	79	40	11	4
														3	4	268.1	67	684	191	232	153	103	5				90	8	265.2	573	174	208	98	72	21
														4	6	510	85	1043	294	318	217	190	24				120	9	337.7	700	224	191	154	91	40
														5	5	409.3	81.9	838	270	208	180	103	77				150	12	326.3	706	215	196	120	117	58
														6	10	1155.3	115.5	1990	653	501	466	274	96				180	12	386.7	797	225	265	161	113	33				Name	Qty	Spines	Thin	Stubby	Mushroom	Filopodia	Branched	Length(µm)	Overall mean
														7	2	119.5	59.7	245	78	59	75	33	0				210	12	379.9	699	209	168	202	115	5			Cell 13	Dendrite	1	954	244	198	228	201	83	1086.1	0.878372
																											240	9	360.6	621	223	116	163	97	22
																											270	5	201.6	384	127	75	110	62	10
																											300	1	122.6	189	42	53	60	25	9
																											330	0	6.7	9	1	3	5	0	0
ID3
	Name	Qty	Spines	Thin	Stubby	Mushroom	Filopodia	Branched	Length(µm)	Overall mean			Cell 11	Order	Qty	Length total(µm)	MEAN	Spines	Thin	Stubby	Mushroom	Filopodia	Branched			Cell 11	Radius(µm)	Intersections	Length(µm)	Spines	Thin	Stubby	Mushroom	Filopodia	Branched
Cell 11	Dendrite	1	1666	474	407	347	299	139	1578.3	1.05557				1	1	9.1	9.1	12	1	6	2	3	0				30	0	0	0	0	0	0	0	0
														2	2	67.1	33.5	85	13	25	29	16	2				60	1	7.5	12	1	6	2	3	0				Name	Qty	Spines	Thin	Stubby	Mushroom	Filopodia	Branched	Length(µm)	Overall mean
														3	4	183.2	45.8	204	50	39	58	31	26				90	5	176.8	188	36	50	58	31	13			Cell 14	Dendrite	1	613	185	97	105	198	28	953.1	0.643164
														4	8	502.9	62.9	586	158	161	100	124	43				120	7	229.6	256	79	70	49	40	18
														5	12	630.6	52.6	651	213	160	136	91	51				150	12	371	431	128	99	77	79	48
														6	4	185.3	46.3	128	39	16	22	34	17				180	9	398.5	404	134	101	70	70	29
																											210	8	302.5	287	75	58	61	66	27
																											240	1	79.4	74	19	20	21	10	4
																											270	0	12.9	14	2	3	9	0	0
																																							Name	Qty	Spines	Thin	Stubby	Mushroom	Filopodia	Branched	Length(µm)	Overall mean
	Name	Qty	Spines	Thin	Stubby	Mushroom	Filopodia	Branched	Length(µm)	Overall mean			Cell 12	Order	Qty	Length total(µm)	MEAN	Spines	Thin	Stubby	Mushroom	Filopodia	Branched			Cell 12	Radius(µm)	Intersections	Length(µm)	Spines	Thin	Stubby	Mushroom	Filopodia	Branched			Cell 15	Dendrite	1	888	271	213	218	100	86	1115.9	0.79577
Cell 12	Dendrite	1	2782	844	771	575	398	194	2070.6	1.34357				1	1	17.4	17.4	34	13	11	7	3	0				30	2	19.6	35	13	12	7	3	0
														2	2	88.5	44.3	153	50	45	41	10	7				60	3	69.8	126	42	39	30	9	6
														3	4	230.3	57.6	356	132	96	44	75	9				90	6	144.6	205	67	33	40	58	7
														4	6	235.4	39.2	316	99	94	72	38	13				120	9	323.7	458	148	153	60	55	42
														5	11	826.2	75.1	1158	316	322	245	171	104				150	10	337.1	463	143	117	130	45	28
														6	10	672.8	67.3	765	234	203	166	101	61				180	13	351.4	492	133	148	96	96	19
																											210	11	403.8	489	170	138	94	50	37
																											240	7	329.5	399	109	97	84	61	48
																											270	1	79.2	102	17	32	25	21	7
																											300	0	11.9	13	2	2	9	0	0
	Name	Qty	Spines	Thin	Stubby	Mushroom	Filopodia	Branched	Length(µm)	Overall mean			Cell 13	Order	Qty	Length total(µm)	MEAN	Spines	Thin	Stubby	Mushroom	Filopodia	Branched			Cell 13	Radius(µm)	Intersections	Length(µm)	Spines	Thin	Stubby	Mushroom	Filopodia	Branched
Cell 13	Dendrite	1	947	267	216	233	143	88	1125.2	0.841628				1	1	2.7	2.7	0	0	0	0	0	0				30	4	71.1	39	6	13	9	1	10
														2	2	30.4	15.2	17	5	5	4	0	3				60	8	195.7	142	36	24	26	27	29
														3	4	211.7	52.9	193	37	26	51	26	53				90	8	262.6	244	77	45	66	39	17
														4	4	133.7	33.4	101	29	15	22	25	10				120	10	352.6	314	96	71	88	40	19
														5	8	504	63	465	151	103	115	74	22				150	3	229.9	195	49	59	41	33	13
														6	6	242.7	40.4	171	45	67	41	18	0				180	0	13.2	13	3	4	3	3	0
	Name	Qty	Spines	Thin	Stubby	Mushroom	Filopodia	Branched	Length(µm)	Overall mean			Cell 14	Order	Qty	Length total(µm)	MEAN	Spines	Thin	Stubby	Mushroom	Filopodia	Branched			Cell 14	Radius(µm)	Intersections	Length(µm)	Spines	Thin	Stubby	Mushroom	Filopodia	Branched
Cell 14	Dendrite	1	2827	459	304	403	267	142	2412.4	1.17186				1	1	9.1	9.1	12	0	0	0	0	0				30	0	0	0	0	0	0	0	0
														2	2	107.7	53.8	112	22	18	20	6	2				60	3	78.2	82	6	7	0	0	2
														3	4	148.9	37.2	189	26	30	26	16	17				90	5	128.9	139	8	10	9	1	0
														4	8	569.5	71.2	749	156	87	149	89	25				120	7	200.4	255	21	10	19	6	0
														5	10	841.1	84.1	927	113	37	52	77	12				150	12	344.9	430	18	36	24	20	26
														6	6	372.6	62.1	453	75	50	80	33	37				180	14	485.2	558	82	36	91	34	11
														7	4	363.6	90.9	385	67	82	76	46	49				210	15	475.7	541	102	47	97	79	27
																											240	9	405	492	128	98	87	65	45
																											270	4	184.7	216	62	31	47	45	24
																											300	2	104.7	113	32	29	28	17	7
	Name	Qty	Spines	Thin	Stubby	Mushroom	Filopodia	Branched	Length(µm)	Overall mean			Cell 15	Order	Qty	Length total(µm)	MEAN	Spines	Thin	Stubby	Mushroom	Filopodia	Branched			Cell 15	Radius(µm)	Intersections	Length(µm)	Spines	Thin	Stubby	Mushroom	Filopodia	Branched
Cell 15	Dendrite	1	2328	384	234	234	265	111	2332.1	0.998242				1	1	2.7	2.7	0	0	0	0	0	0				30	3	22.8	10	0	0	0	0	0
														2	2	29.6	14.8	20	0	0	0	0	0				60	8	225	172	9	3	9	0	1
														3	4	182.5	45.6	154	7	1	4	5	0				90	10	317.6	324	28	9	19	13	12
														4	8	359	44.9	386	59	32	67	19	23				120	13	446.5	454	64	40	49	48	25
														5	10	904.5	90.5	932	169	131	73	106	37				150	14	512.4	509	88	57	62	59	24
														6	10	661.8	66.2	606	115	55	59	87	44				180	8	421.9	411	78	49	27	58	27
														7	4	192.1	48	230	34	15	31	48	7				210	5	266	283	58	38	41	50	18
																											240	1	80.1	95	33	13	21	24	4
																											270	1	30.2	63	23	23	6	11	0
																											300	0	9.6	7	3	2	0	2	0

## Sheet: Fig.4
Phospho RTK		+/-	-/-			LC3-II				p62								CI	CII	CIII	CIV	SCC	(mU/U CS)
					WT	P1	24313.1	21817.5	22686.1	21666	22564.1						+/+
1	EGF R	50185	47230			P7	26940.5	26079.8	26181.5	28351.3	26671.9						1	144	190	1103	1113	165
2	EGF R	61275	45229			P14	18791.2	18143.4	17407.9	19723.6	2130.02						2	217	122	646	695	83
3	ErbB2	22812	52461			P21	8250	6845.51	7684.34	17064.1	16989.3						3	180	142	622	614	83
4	ErbB2	21499	50910		KO	P1	48547.5	42905.1	44667.3	36713.8	38211						4	200	141	479	544	67
5	ErbB3	11803	10244			P7	45058.8	40480.7	41261.6	26300.2	24967.6
6	ErbB3	13188	10189			P14	19386.8	17932.6	17778.9	20333.4	20799						-/-
7	ErbB4	74215	72483			P21	5651.71	5571.3	7239.95	13617.5	11983.1						1	127	191	1013	1027	172
8	ErbB4	74006	73081														2	177	123	624	543	85
9	FGF R2	1482	2267		P7	phospho IGF/Ins		total IGF		phospho AKT		total AKT	phospho IRS58		total IRS58		3	185	150	677	637	96
10	FGF R2	2099	2789		WT	14943.7	12564.8	26184	25879.4	30666	32698.9	18179.9	13919.3	15856.8	30458.2		4	170	118	656	549	81
11	FGF R3	45080	47515		KO	6531.39	7564.44	33713.9	34121.7	23872.4	20216.3	22864.2	8746.44	8217.28	31396.6
12	FGF R3	44611	46233
13	FGF R4	29004	28056
14	FGF R4	31144	23078
15	InsR	17506	10760
16	InsR	20049	10679
17	IGF-1R	29014	14624
18	IGF-1R	31331	12936
19	Axl	64639	47798
20	Axl	65045	46248
21	Dtk	66747	60969
22	Dtk	66223	57589
23	Mer	5113	5313
24	Mer	5878	3820
25	HGF R	2851	3793
26	HGF R	3801	2654
27	MSP R	52288	58370
28	MSP R	49813	58619
29	PDGF Ra	80391	88650
30	PDGF Ra	83374	89891
31	PDGF Rb	14916	16696
32	PDGF Rb	17624	15568
33	SCF R	49388	39241
34	SCF R	50499	41444
35	Flt-3	29393	20305
36	Flt-4	29537	23019
37	M-CSF R	10024	8963
38	M-CSF R	10911	8852
39	c-RET	20602	16330
40	c-RET	21780	14783
41	Tie-1	25278	16268
42	Tie-1	28527	15242
43	Tie-2	21836	10057
44	Tie-2	23099	8861
45	TrkA	33308	16576
46	TrkA	29310	14570
47	TrkB	92176	90892
48	TrkB	91251	88882
49	TrkC	75090	69533
50	TrkC	72803	69474
51	VEGF R1	23152	23753
52	VEGF R1	21046	25087
53	VEGF R2	15406	11195
54	VEGF R2	17752	13859
55	VEGF R3	50696	51219
56	VEGF R3	49744	50066
57	MuSK	57442	51819
58	MuSK	57604	53522
59	EphA1	5969	4395
60	EphA1	5636	4632
61	EphA2	4369	5369
62	EphA2	4714	5421
63	EphA3	6902	8527
64	EphA3	8566	11511
65	EphA6	28126	18564
66	EphA6	30558	16366
67	EphA7	12145	5638
68	EphA7	10705	4700
69	EphA8	7968	4029
70	EphA8	8480	3032
71	EphB1	13963	9024
72	EphB1	16658	8835
73	EphB2	4201	5577
74	EphB2	4583	6060
75	EphB4	7369	7675
76	EphB4	6293	8382
77	EphB6	49210	53947
78	EphB6	49599	51244
79	PBS	1449	1791
80	PBS	1875	1725
